1 **Single-cell genomics improves the discovery of risk variants and genes of cardiac traits**

2  
3 Alan Selewa<sup>1\*</sup>, Kaixuan Luo<sup>2\*</sup>, Michael Wasney<sup>3+</sup>, Linsin Smith<sup>4+</sup>, Chenwei Tang<sup>5</sup>, Heather  
4 Eckart<sup>3</sup>, Ivan Moskowitz<sup>2,6</sup>, Anindita Basu<sup>3</sup>, Xin He<sup>2#</sup>, Sebastian Pott<sup>3#</sup>

5  
6 <sup>1</sup>Biophysical Sciences Graduate Program,

7 <sup>2</sup>Department of Human Genetics,

8 <sup>3</sup>Section of Genetic Medicine, Department of Medicine,

9 <sup>4</sup>Committee on Genetics, Genomics and Systems Biology,

10 <sup>5</sup>The College,

11 <sup>6</sup>Department of Pediatrics,

12 The University of Chicago, Chicago, IL 60637, USA;

13 \*, +, # These authors contributed equally.

14

15 Correspondence: [obasu@uchicago.edu](mailto:obasu@uchicago.edu), [xinhe@uchicago.edu](mailto:xinhe@uchicago.edu), [spott@uchicago.edu](mailto:spott@uchicago.edu)

16

17 **Abstract**

18 Genome-wide association studies (GWAS) have linked hundreds of loci to cardiac diseases.

19 However, in most loci the causal variants and their target genes remain unknown. We developed

20 a combined experimental and analytical approach that integrates single cell epigenomics with

21 GWAS to prioritize risk variants and genes. We profiled accessible chromatin in single cells

22 obtained from human hearts and leveraged the data to study genetics of Atrial Fibrillation (AF),

23 the most common cardiac arrhythmia. Enrichment analysis of AF risk variants using cell-type-

24 resolved open chromatin regions (OCRs) implicated cardiomyocytes as the main mediator of AF

25 risk. We then performed statistical fine-mapping, leveraging the information in OCRs, and

26 identified putative causal variants in 122 AF-associated loci. Taking advantage of the fine-

27 mapping results, our novel statistical procedure for gene discovery prioritized 45 high-confidence

28 risk genes, highlighting transcription factors and signal transduction pathways important for heart

29 development. We further leveraged our single-cell data to study genetics of gene expression. An

30 unexpected finding from earlier studies is that expression QTLs (eQTLs) are often shared across

31 tissues even though most regulatory elements are cell-type specific. We found that this sharing is

32 largely driven by the limited power of eQTL studies using bulk tissues to detect cell-type-specific

33 regulatory variants. This finding points to an important limitation of using eQTLs to interpret

34 GWAS of complex traits. In summary, our analysis provides a comprehensive map of AF risk

35 variants and genes, and a general framework to integrate single-cell genomics with genetic studies

36 of complex traits.

37

## 38 Introduction

39 Cardiac diseases are a leading cause of mortality across the world<sup>1,2</sup>. GWAS of cardiac traits have  
40 uncovered a large number of associations, such as >100 loci linked to atrial fibrillation (AF)<sup>3-7</sup>.  
41 However, in most loci the disease-driving causal variants and risk genes remain unknown due to  
42 several common challenges. Most trait-associated variants are located in non-coding regions with  
43 possible regulatory effects<sup>8</sup> and studies have highlighted enrichment of risk variants in cis-  
44 regulatory elements (CREs) in trait-related cell and tissue types<sup>8-10</sup>. Existing disease-related  
45 regulatory and epigenomic datasets, however, were often collected from bulk tissue samples that  
46 represent complex mixtures of cell types<sup>11,12</sup>. A lack of cell type-resolved epigenomic data thus  
47 limits our ability to interpret regulatory effects of variants. Even with comprehensive epigenomic  
48 maps, extensive linkage disequilibrium (LD) in the human genome hinders identification of causal  
49 variants in trait-associated loci. Additionally, non-coding variants are not easily associated with  
50 their target genes because of pervasive long-range gene regulation. Together, these challenges  
51 make it difficult to translate GWAS associations into molecular mechanisms.

52 To address these challenges in the context of heart diseases, we developed an integrated  
53 framework that unifies advances in single cell epigenomics, computational fine-mapping and a  
54 novel procedure for risk gene discovery. Specifically, we performed single-cell chromatin  
55 accessibility profiling to map CREs across major cell types in the heart. Our statistical fine-  
56 mapping method utilizes the CRE maps to infer disease-relevant cell types and takes advantage of  
57 such information to identify putative causal variants. Our novel gene-mapping approach then  
58 aggregates information of all fine-mapped SNPs to predict the risk genes, considering multiple  
59 sources of information such as distance and chromatin loops between enhancers and promoters.  
60 Application of this framework to AF revealed a number of putative risk variants and genes,  
61 highlighting biological processes important to the genetics of AF.

62 Motivated by our success in studying genetics of heart diseases, we took advantage of our single-  
63 cell genomics data to study genetics of gene expression, i.e., expression QTLs (eQTLs). By linking  
64 genetic variants with gene expression, eQTLs help annotate the regulatory effects of variants and  
65 have been used as key resources for interpreting GWAS findings<sup>13,14</sup>. An unexpected finding from  
66 eQTL studies is that eQTLs from diverse tissues show a high degree of sharing<sup>15,16</sup>, despite cell  
67 type specificity of most CREs<sup>17</sup>. This finding is important, as it suggests the possibility that current  
68 eQTL studies may provide limited information for studying diseases, which are generally specific

69 to certain tissues or organs. Indeed, it was estimated that eQTLs from bulk gene expression may  
70 explain only 10-20% of disease heritability<sup>18</sup>. It has been difficult to resolve the puzzle of eQTL  
71 tissue sharing, largely due to the lack of cell-type information for identified eQTLs from bulk  
72 tissue samples. Taking advantage of our data, we were able to assign cell types to many heart  
73 eQTLs. Our analysis suggests two key factors for explaining high tissue-sharing of eQTLs, the  
74 sharing of cell types across tissues and the low sensitivity of bulk eQTL studies in detecting cell-  
75 type specific regulatory effects.

76

## 77 **Results**

78 **Overview of the experimental and computational approach.** Our approach combines single-  
79 cell genomics with novel computational procedures to study genetics of cardiac traits (Fig. 1).  
80 Using single nucleus RNA-sequencing<sup>19-21</sup> (snRNA-seq) and single cell ATAC-seq (scATAC-  
81 seq)<sup>22,23</sup>, we obtained transcriptome and open chromatin regions (OCRs) across all major cell types  
82 in the adult human heart (Fig. 1, step 1). These OCR profiles allow us to discover cell types  
83 enriched with the genetic risks of traits of interest. To identify specific causal variants in trait-  
84 associated loci, we performed Bayesian statistical fine-mapping, a common strategy that uses  
85 GWAS statistics as well as LD patterns to infer likely causal variants driving association signals<sup>24</sup>.  
86 Compared to standard fine-mapping, our method assigns prior probabilities to favor variants  
87 located in OCRs of enriched cell types (Fig. 1, step 2). The use of functionally informed prior has  
88 been shown to improve the accuracy of fine-mapping<sup>9,25,26</sup>. We believe this is particularly  
89 advantageous with single-cell data. Indeed, compared to OCRs from bulk tissues which include a  
90 mixture of all cell types, the OCRs in disease-relevant cell types would be particularly enriched  
91 with genetic signals. After fine-mapping, the candidate SNPs and their associated cell-type  
92 information allow us to assign the cell type(s) through which the causal variants are likely to act  
93 across disease-associated loci.

94 Finally, we developed a procedure to infer causal genes at each locus (Fig. 1, step 3), addressing  
95 some common challenges. In “gene association tests”, researchers test if the set of SNPs near a  
96 gene collectively show disease association<sup>27,28</sup>. These types of methods, however, cannot  
97 distinguish between multiple genes close to disease-associated variants. Alternatively, researchers  
98 may perform fine-mapping first, then link the high-confidence SNPs to target genes using  
99 additional information. However, fine-mapping alone rarely leads to a single, or even a few, high

100 confidence SNPs at associated loci<sup>29</sup>, therefore this approach also has limited utility. In contrast,  
101 our procedure is directly informed by variant fine-mapping, but instead of considering only high-  
102 confidence SNPs, it aggregates information of all fine-mapped ones in a locus. To see its benefit,  
103 suppose fine-mapping in a locus implicates 10 putative causal variants without any single one  
104 reaching high confidence; however, if all 10 SNPs likely target the same gene, we still achieve  
105 high-confidence at the gene level. To implement this idea, our procedure partitions the evidence  
106 of a SNP being causal variant into nearby genes, with its likely target genes receiving larger  
107 evidence. The information is then aggregated across all SNPs to produce gene level evidence. The  
108 details are described below (Fig. 5a) and in Methods.

109

110 **Single-cell transcriptome and chromatin accessibility profiling reveals multiple cell types in**  
111 **the human heart.** We performed snRNA-seq and scATAC-seq using the Chromium platform  
112 (10x Genomics) (Fig. 1, step 1). The heart samples were obtained from the left and right ventricles  
113 (LV and RV), the interventricular septum, and the apex of three adult male donors (Supplementary  
114 Table 1). After quality control, we retained data of 49,359 cells in snRNA-seq and 26,714 cells in  
115 scATAC-seq, respectively (Extended Data Fig. 1 and 2).

116 We characterized cell populations with clustering analysis in both snRNA-seq and scATAC-  
117 seq datasets. From snRNA-seq<sup>30</sup>, we identified eight major cell types based on marker genes and  
118 comparison to published single-cell heart atlas data<sup>20</sup> (Fig. 2a, left), with ~70% of cells from  
119 cardiomyocytes (CMs), fibroblasts, and endothelial cells. Clustering based on scATAC-seq data<sup>31</sup>  
120 revealed similar cell populations (Fig. 2a, right). To match the clusters identified by both  
121 technologies, we computationally transferred cluster labels from snRNA-seq onto scATAC-seq  
122 clusters<sup>30</sup> (Methods) and unambiguously identified matching cell types (Extended Data Fig. 3a, b).  
123 Indeed, expression and chromatin accessibility near marker genes showed high cell-type  
124 specificity (Fig. 2b, c). Across the eight clusters, gene scores inferred from scATAC-seq, a metric  
125 that summarizes the chromatin accessibility near a gene<sup>31</sup> (Methods), were highly correlated with  
126 transcript levels in the matched clusters (Extended Data Fig. 3c). These results supported the cell-  
127 type assignments in both modalities.

128

129 **Analysis of scATAC-seq data identifies cell-type-specific regulatory elements and their**  
130 **regulators.** We pooled cells of the same cell type and identified OCRs separately in each cell type.

131 Combining samples of the same cell type (Extended Data Fig. 4a, b), we detected 45,000-150,000  
132 OCRs per cell type (Extended Data Fig. 4c) yielding a union set of 352,904 OCRs. *K*-means  
133 clustering of these regions based on their accessibility suggested that most OCRs are active in  
134 specific cell types (Fig. 3a). Using differential accessibility (DA) analysis, we identified 173,782  
135 (49%) OCRs with cell-type-specific accessibility (Methods). We divided the remaining 179,122  
136 (51%) OCRs into three categories based on their detection across cell types: shared in 2-3 cell  
137 types, shared in  $\geq 4$  cell types (denoted as Shared 2-3 and Shared 4), and remaining ones, denoted  
138 as “non-DA OCRs”, which mostly comprise peaks with low read counts (Methods). In agreement  
139 with previous observations, shared OCRs were enriched in promoter regions<sup>32</sup> (Fig. 3b, c).

140 We compared our OCRs to regulatory regions identified in bulk samples from multiple tissues  
141 in ENCODE<sup>12</sup>. As expected, a large fraction of OCRs from major heart cell types (e.g., CMs,  
142 endothelial, fibroblasts) overlapped with DNase Hypersensitive sites (DHS) from the ventricles  
143 (Fig. 3d, top). In contrast, smaller proportions of OCRs from rare cell types (e.g., myeloid)  
144 overlapped with bulk DHS, suggesting higher sensitivity of detecting regulatory elements in rare  
145 cell types by scATAC-seq (Fig. 3d, top, Extended Data Fig. 4d). Additionally, 60-80% of OCRs  
146 from major cell types overlapped with H3K27ac regions from LV and RV, suggesting enhancer  
147 activity (Fig. 3d, bottom). Together, these results showed that scATAC-seq identified cell-type  
148 specific regulatory elements.

149 Chromatin accessibility is largely controlled by lineage-specific transcription factors (TFs)<sup>33</sup>.  
150 To identify these TFs, we assessed the enrichment of TF motifs in OCRs specific to each cell type  
151 and identified 260 significantly enriched motifs (Methods). Because TFs of the same family may  
152 share similar motifs, we performed additional analysis to infer the exact TFs driving the  
153 enrichment, assuming that for these TFs, their motif enrichment should correlate with gene  
154 expression across cells. To test this, we correlated motif accessibility scores of TFs calculated by  
155 chromVar<sup>34</sup> with their accessibility-derived gene scores, a proxy of gene expression<sup>31</sup> (Methods).  
156 This analysis yielded 76 TFs with enriched motifs and correlation  $> 0.5$  (Fig. 3e, Supplementary  
157 Table 2). Many of these TFs are cell type-specific (Fig. 3e) and include known CM regulators,  
158 such as TBX5, GATA4, and MEF2A<sup>35</sup> (Fig. 3f). These results provided a compendium of putative  
159 transcriptional regulators across major cell types in the human heart.

160

161 **Open chromatin regions in CMs are enriched with risk variants of heart diseases and inform**  
162 **statistical fine-mapping.** Using our cell-type-resolved OCRs, we assessed the contribution of  
163 different cell types to genetics of heart-related traits<sup>36</sup>. Risk variants from GWAS of two cardiac  
164 traits, AF and PR interval, were almost exclusively enriched (>10-fold) in OCRs from CMs (Fig.  
165 4a). In contrast, variants of cardiovascular traits, CAD and blood pressure, were enriched across  
166 multiple cell types (Fig. 4a). As control, non-cardiovascular traits showed little or no enrichment  
167 in heart cell types (Fig. 4a). These results suggested distinct cell type origins of different heart-  
168 related traits, highlighting CMs as the main cell type underlying AF and PR interval.

169 This observation motivated us to statistically fine-map causal variants in 122 approximately  
170 independent AF-associated loci<sup>37</sup>. Our procedure favors putatively functional variants in protein-  
171 coding regions, conserved sequences, and OCRs in CMs (Extended Data Fig. 5a, Methods)<sup>38</sup>.  
172 Compared to fine-mapping that treats all variants equally (uniform prior), this procedure increased  
173 the number of high-confidence risk variants. In total, we identified 54 variants whose probabilities  
174 of being causal variants, denoted as Posterior Inclusion Probabilities (PIP), are 0.5 or higher,  
175 compared with 39 at  $PIP \geq 0.5$  under the uniform prior (Fig. 4bc, Supplementary Table 3). Across  
176 122 loci, our procedure narrowed down putative causal variants to 5 or fewer SNPs in 48 loci (Fig.  
177 4d).

178 The fine-mapping results inform how the risk variants are partitioned into various functional  
179 categories, such as exons and OCRs in different cell types. The sum of PIPs of all SNPs assigned  
180 to a category can be interpreted as the expected number of causal variants in that category. We  
181 found that >40% of causal signals are from OCRs and 25% of signals from CM-specific OCRs,  
182 highlighting the key role of CMs in AF (Fig. 4e). As expected, exons and UTRs explain only 4%  
183 of causal signals.

184 The same PIP summation approach can also be applied to each locus, with the PIP sum of a  
185 functional category, e.g., OCRs or exons, now interpreted as the probability that the causal variant  
186 in that locus falls into that category. Using this approach, we estimate that at nearly half of all loci,  
187 causal variants have >50% probability to localize to OCRs (Fig. 4f). Further partitioning of OCRs  
188 into cell-type-level categories (Fig. 3b), we identified 31 loci where the causal signals almost  
189 entirely (>90%) come from CM-OCRs (Fig. 4g). Interestingly, in three loci, the most likely cell  
190 types are fibroblast or immune cells, respectively, based on OCR annotations (Fig. 4g,  
191 Supplementary Table 4). For example, at one locus (chr17:36809344-38877404), lymphoid OCRs



192 explain 56% causal signal and the most likely target gene is *IKZF3* (see our gene mapping results  
193 below), a TF involved in the regulation of lymphocyte development<sup>39</sup>. In another locus  
194 (chr17:7317398-8306425), myeloid OCRs explain 53% causal signal, with the most likely gene  
195 being *TNFSF13*, another gene with immune functions<sup>40</sup>. Together these results highlighted that  
196 our approach can identify cell type contexts of individual loci, including the cell types missed by  
197 enrichment analysis.

198

### 199 **Fine-mapped variants are supported by regulatory annotations and experimental validation.**

200 We characterized the regulatory functions of 54 specific variants at  $PIP \geq 0.5$ . The majority  
201 (31/54) were located in CM-OCRs (Fig. 4h, Supplementary Table 3). 57% (31/54) of all variants  
202 and 87% (27/31) of variants in CM-OCRs overlapped H3K27ac marks in the heart, suggesting  
203 enhancer activities (Fig. 4h). 37% of variants (20/54) overlapped with fetal DHS<sup>12</sup>, suggesting that  
204 these variants may act across fetal and adult stages (Fig. 4h). Additionally, 24% of variants were  
205 linked to promoters through chromatin loops in Promoter-capture HiC (PC-HiC) from iPSC  
206 derived CMs<sup>41</sup> (Fig. 4h). Using mouse ChIP-seq datasets of three key cardiac TFs (*GATA4*, *TBX5*,  
207 *NKX2-5*)<sup>35</sup>, we found that five candidate variants are located in human orthologous regions of TF  
208 binding sites, representing 7-fold enrichment over expectation by chance (Extended Data Fig. 5b).  
209 We also found that 22% (12/54) SNPs alter binding motifs (Fig. 4h) of one of the 76 TFs we  
210 identified as likely transcriptional regulators in heart cell types (Fig. 3e). Together, these results  
211 supported regulatory functions of many fine-mapped variants.

212 We experimentally tested six non-exonic variants with  $PIP > 0.95$  that were located inside CM-  
213 OCRs and overlapped with putative enhancers marked by H3K27ac or H3K4me1/3 (Fig. 4i,  
214 Supplementary Table 5). Four out of six variant-containing OCRs induced reporter gene  
215 expression in mouse HL-1 cells<sup>42,43</sup> (Extended Data Fig. 6a, Methods), but not in a fibroblast line  
216 (3T3), suggesting cell-type-specific activity of the four OCRs (Extended Data Fig. 6b). Three out  
217 of these four variants showed allelic changes of reporter activities in HL-1 cells, for at least one  
218 alternative allele (Fig. 4i). The most striking effect was observed for rs7172038. Two alternative  
219 alleles of this SNP (A and G) strongly reduced activation. The enhancer containing this SNP  
220 interacts with the promoter of *HCN4* located about 5 kb away, according to Activity-by-Contact  
221 (ABC) score<sup>44</sup> (Supplementary Table 3). *HCN4* is a well-known AF risk gene and is  
222 physiologically implicated in cardiac rhythm control<sup>45</sup>. Consistent with these results, deletion of a

223 syntenic 20 kb region in mice containing this enhancer significantly reduced the expression of  
224 *HCN4*<sup>46</sup>. Notably, in two out of three SNPs with allelic effects, the use of functional information  
225 in fine-mapping significantly boosted their PIPs to  $\geq 0.95$  (PIP = 0.36 for rs7172038 and 0.39 for  
226 rs1152591 under the uniform prior). These experimental results supported regulatory functions of  
227 our high confidence variants.

228 In principle, we expect regulatory variants to affect transcript levels of target genes. Using GTEx  
229 eQTL data from the left ventricle (LV), we found that only 29% (16/54) variants are eQTLs  
230 (Supplementary Table 6). And only in three cases, the eQTLs showed plausible evidence of  
231 colocalization (PP4 > 0.2 using coloc<sup>47</sup>) with the AF risk (Supplementary Table 6). The small  
232 overlap of fine-mapped variants with heart eQTLs suggests a limitation of bulk eQTL data to  
233 identify regulatory variants, an issue we will address in more detail below.

234

### 235 **A novel computational procedure utilizes fine-mapping results to identify AF risk genes.**

236 Despite our fine-mapping efforts, there remained considerable uncertainty of causal variants in  
237 most loci (Fig. 4d). Even if the causal variants are known, assigning target genes can be difficult  
238 due to long-range regulation of enhancers<sup>48</sup>. We developed a novel procedure, called Mapgen, to  
239 address these problems (Fig. 5a): **(1)** For every putative causal SNP, we assign a weight to each  
240 nearby gene, considering multiple ways a SNP may affect a gene. The weight of a gene can be  
241 viewed as the probability with which a particular SNP affects that gene. For a SNP in an exon or  
242 in a regulatory region linked to a particular gene, we assign a weight of 1 to that gene. When a  
243 SNP cannot be linked to any gene in these ways, its target genes are assigned using a distance  
244 weighted function (Fig. 5a, Methods). **(2)** The PIP of each SNP is then distributed among all  
245 potential target genes according to the weights of these genes. The “fractional PIP” a gene receives  
246 from a SNP can be viewed as the support the SNP provides to that gene. **(3)** For each gene, we  
247 then sum over the fractional PIPs it receives from all candidate SNPs in the region. The resulting  
248 “gene PIP” approximates the probability of a gene being causal (Methods). Similar to variant-level  
249 fine-mapping, we also define a “credible gene set”, the set of genes that capture the causal signal  
250 at a locus with high probability (Methods).

251 We identified 45 genes with gene PIP  $\geq 0.8$ , and 88 with gene PIP  $\geq 0.5$  (Fig. 5b,  
252 Supplementary Table 7, and Table 1 for top prioritized genes). At each locus, we obtained credible  
253 gene sets that captured at least 80% of the causal signal. These credible gene sets contained a single



254 gene in 41 out of 122 blocks, and two genes in 32 blocks (Fig. 5c, Supplementary Table 8). The  
255 genes at  $PIP \geq 0.8$  included many known AF risk genes such as TFs involved in cardiac  
256 development and atrial rhythm control (e.g. *TBX5*<sup>49</sup> and *PITX2*<sup>50</sup>), ion channels (e.g. *KCND2*<sup>51</sup> and  
257 *KCNN3*<sup>52</sup>), and genes involved in muscle contraction (e.g. *TTN*).

258 We note that a key benefit of Mapgen is that even in the absence of high-confidence causal  
259 variants, it may still identify putative risk genes. In 20 out of 45 genes at  $PIP \geq 0.8$ , the SNP level  
260 PIPs were diffused, i.e., no single SNP reached  $PIP \geq 0.5$  (Supplementary Table 7). As an  
261 example, *CAMK2D*, an ion channel gene implicated in AF<sup>53</sup>, was supported by eight SNPs (highest  
262  $PIP = 0.43$ ), all likely targeting *CAMK2D*. This led to a gene level  $PIP = 0.996$  (Extended Data  
263 Fig. 7a, Supplementary Table 3). This observation thus highlighted the advantage of aggregating  
264 information from all putative causal variants.

265 We compared the Mapgen results with those of three common approaches for nominating target  
266 genes: closest proximity to risk SNPs, chromatin conformation that links variant-containing  
267 enhancers to target promoters, and eQTL analysis.

268 We first assessed the distance between supporting SNPs and their predicted target genes. Among  
269 the 45 genes at  $PIP \geq 0.8$ , six (15%) were not the nearest genes to the top GWAS SNPs: *ETV1*,  
270 *TAB2*<sup>54</sup>, *FGF9*, *PLN*<sup>55,56</sup>, *CALU*<sup>57</sup> and *DBXI*. All except *DBXI* have previously described impact  
271 on cardiovascular physiology or rhythm (Supplementary Table 9). For example, *ETV1*<sup>58,59</sup>, a TF  
272 important in heart development<sup>60</sup> has been recently implicated in atrial remodeling and AF<sup>59</sup>.  
273 *FGF9* is supported by rs9506925 (SNP  $PIP = 0.76$ ) which is linked, via PC-HiC, to the *FGF9*  
274 promoter 1 Mb away (Fig. 5d). FGF signaling and specifically *FGF9* have been implicated in  
275 muscle/heart development and diseases<sup>61,62</sup>. Another important difference between Mapgen and  
276 the common practice of choosing the nearest genes is that the latter always chooses a single  
277 candidate in a locus but does not quantify the uncertainty. For instance, rs1152591 had a  $PIP$  of  
278 0.96, yet it contacts the promoters of four genes in PC-HiC. Two of these genes appear plausible  
279 from external evidence (*SYNE2*<sup>63,64</sup> and *AKAP5*<sup>65,66</sup>), but neither is nearest to the SNP (Extended  
280 Data Fig. 7b, Supplementary Table 3). Our gene PIPs reflect this uncertainty: all four genes had  
281 gene  $PIP \sim 0.25$ . Together, these results show the limitations of assigning nearest genes as targets  
282 and suggest that a probabilistic approach incorporating multiple sources of information is  
283 preferable.

284 We also considered the use of chromatin conformation in resolving target genes of high PIP  
285 SNPs. We found that while chromatin looping data were useful, as shown in the *FGF9* example  
286 above, using such information alone may miss many potential risk genes. Among 54 SNPs at  
287  $PIP \geq 0.5$ , only three showed chromatin interactions with promoters based on ABC scores<sup>67</sup>, and  
288 14 if we included both ABC and PC-HiC data. Additionally, it is common to observe multiple  
289 chromatin loops at a single SNP. Among the 14 SNPs with chromatin interactions, 64% (9/14)  
290 contact more than one promoter (Supplementary Table 3), highlighting the uncertainty of target  
291 genes from chromatin looping data.

292 Use of expression QTLs is another common strategy for linking SNPs to genes. However, as  
293 reported above, few fine-mapped variants colocalized with eQTLs. Even if a GWAS SNP is also  
294 an eQTL, it may not identify the correct target gene. For example, in the *TTN* locus, the top SNP  
295 (rs3731746) is an eQTL of *FKBP7*, but the true risk gene is very likely *TTN*<sup>68,69</sup>.

296 Altogether, these results demonstrated the improved ability of Mapgen to nominate plausible  
297 candidate genes compared to alternative approaches linking SNPs to genes.

298  
299 **Putative AF risk genes are supported by multiple lines of evidence.** We evaluated our candidate  
300 genes using multiple sources of data. Consistent with enrichment of AF variants in CM-OCRs,  
301 candidate genes ( $PIP \geq 0.8$ ) tended to have higher expression in CMs, compared with other genes  
302 in the AF-associated loci (Fig. 5e). Additionally, high PIP genes were enriched in AF-related  
303 Mendelian disorders (Supplementary Table 10) (Fig. 5f). We also compared our genes with those  
304 prioritized by earlier work that used additional functional data such as AF-related gene ontology  
305 and heart gene expression<sup>5,70</sup>. While such functional data was not used in our analysis, the genes  
306 at  $PIP \geq 0.8$  scored on average substantially higher in two earlier studies than low PIP genes  
307 (Extended Data Fig. 8), and 32 of them (71%) were supported by at least one study (Supplementary  
308 Table 7).

309 We next assessed the functions of candidate genes using Gene Ontology (GO) and gene  
310 networks<sup>71</sup>. GO analysis showed enrichment of Biological Processes related to heart development  
311 and cardiac function, and of Molecular Functions such as ion channels, hormone binding and  
312 protein tyrosine kinase (Fig. 5g, Supplementary Table 11). For network analysis, we used the  
313 STRING gene network built with genes at a relaxed PIP threshold of 0.5 (88 genes) to increase the  
314 number of interactions. This analysis highlighted some well-known processes in AF, such as ion

315 channels, and structure components of heart muscle (Fig. 5h). A prominent subnetwork consisted  
316 of key TFs, including *GATA4*, *TBX5*, *NKX2-5* and *HAND2*, implicated previously in AF genetics  
317 and/or heart development<sup>49,72-74</sup> (Fig. 5h). Two other TFs in the network, *PITX2* and *ZFHX3*, are  
318 also well-known AF genes<sup>49</sup>. Combined with the fact that putative causal variants were enriched  
319 in binding sites of *TBX5*, *NKX2-5* and *GATA4* (Fig. 4h, Extended Data Fig. 5b), these results  
320 suggested that perturbation of transcriptional regulatory networks consisting of TFs and their  
321 targets, plays a critical role in the genetics of AF. Additionally, the interaction network highlighted  
322 signal transduction pathways, including MAPK signaling and Ephrin signaling (Fig. 5h). Both  
323 processes are important in heart development<sup>75-78</sup>. Indeed, 19 out of 88 genes at  $PIP \geq 0.5$  were  
324 annotated by the GO term “regulation of intracellular signal transduction” (FDR < 0.02)  
325 (Supplementary Table 12).

326 Finally, we found additional literature support for the candidate genes. 37 out of 45 (82%) genes  
327 at  $PIP \geq 0.8$  have reported roles in cardiac processes and/or diseases from literature  
328 (Supplementary Table 9). The subset of genes at  $PIP \geq 0.95$  with literature support, as well as  
329 their supporting SNPs, were shown in Table 1. The majority of these genes have not been  
330 established as AF risk genes through functional studies, representing novel yet biologically  
331 plausible risk genes.

### 332 333 **Cell-type-specific epigenomes reveal insights to extensive tissue-sharing of bulk eQTLs.**

334 While a large fraction of fine-mapped AF SNPs fell inside CM-specific OCRs (Fig. 4e), most of  
335 them did not colocalize with heart eQTLs (Supplementary Table 6). This observation is consistent  
336 with previous findings that only a small proportion of GWAS variants or heritability are explained  
337 by eQTLs<sup>18,79</sup>. We hypothesized that bulk eQTL studies, which are conducted on bulk tissues  
338 consisting of multiple cell types, may miss the gene regulatory effects of causative variants because  
339 of limited power to detect eQTLs with effects restricted to certain cell types. This hypothesis may  
340 also help explain the puzzling observation that despite the cell-type-specific nature of regulatory  
341 elements, discovered cis-eQTLs are highly shared across tissues<sup>16</sup>. Cell-type-resolved chromatin  
342 accessibility and transcriptome data allowed us to infer cell-type origins of bulk eQTLs and  
343 provided an opportunity to investigate eQTL tissue-sharing patterns.

344 We focused our analysis on 1,216 heart (LV) eQTLs from GTEx where the causal variants have  
345 been fine-mapped to single variants with high confidence ( $PIP \geq 0.8$ ) by the GTEx consortium

346 (Supplementary Table 13). We divided these eQTLs into disjoint classes based on eQTL locations,  
347 including exons, UTRs, introns, OCRs in specific cell types, and OCRs shared with varying  
348 numbers of cell types. These categories suggested possible cell-type origins of eQTLs and allowed  
349 us to compare tissue sharing patterns of different categories, e.g., eQTLs in cell-type-specific  
350 OCRs vs. those in shared OCRs across cell types (see Methods).

351 We first confirmed that the majority of eQTLs were highly shared, i.e., found in >30 tissues in  
352 GTEx (Fig. 6a). This high degree of sharing, however, masked heterogeneity across different  
353 categories. While eQTLs falling into OCRs shared in multiple cell types were extensively shared  
354 across tissues (Fig. 6b), eQTLs in cell-type-specific OCRs showed variable levels of sharing.  
355 Fibroblast-eQTLs (eQTLs in fibroblast-specific OCRs) and myeloid-eQTLs were highly shared  
356 (median 25 and 38 tissues, respectively), but most CM-eQTLs were found in <10 tissues (Fig. 6b).  
357 We hypothesized that this variability reflected different degrees of cell type sharing between the  
358 heart and other tissues, with fibroblasts and myeloid cells shared in more tissues and CMs shared  
359 in fewer. To test this, we compared heart eQTLs with those from the brain and whole blood. As  
360 expected, heart eQTLs from immune cell OCRs had the highest sharing with whole blood, while  
361 eQTLs of all heart cell types have low sharing with the brain (Fig. 6c). Together, our results  
362 highlighted considerable variability of tissue sharing patterns of heart eQTLs, depending on their  
363 likely cell-type origins.

364 This finding appeared contradictory to the overall high level of tissue sharing of eQTLs. To  
365 understand to understand the basis for this observation, we assessed the proportions of heart eQTLs  
366 in functional categories, focusing on eQTLs in OCRs, whose cell type origins could be inferred.  
367 Unexpectedly, a large proportion of those eQTLs were from OCRs shared in multiple cell types  
368 (Fig. 6d), even though more than half of all OCRs were cell-type-specific (Fig. 3a). To better  
369 understand these results, we compared the proportions of eQTLs in each category with the  
370 proportions of matched random control SNPs (Methods). While eQTLs in OCRs from single cell  
371 types showed 2-9 fold enrichment, those shared with 4 or more cell types showed 26-fold  
372 enrichment (Fig. 6d). Indeed, the enrichment is highly correlated with the number of cell types in  
373 which an OCR is detected (Fig. 6e). We thus concluded that discovered eQTLs are biased towards  
374 those with broad effects across multiple cell types, explaining the overall high tissue-sharing across  
375 eQTLs.

376 We reasoned that this bias towards eQTLs with shared effects, or equivalently, the depletion of  
377 cell-type-specific eQTLs, can be explained by the nature of bulk eQTL studies. When the effect  
378 of an eQTL on a gene is limited to a single cell type, but the gene is expressed in other cell types,  
379 the effect of the variant on the bulk gene expression would be diluted, leading to lower power of  
380 detecting this eQTL. This argument was supported by the observation that gene expression was  
381 less cell-type-specific than accessibility of regulatory elements. In heart eQTLs localized to CM-  
382 specific OCRs, the expression of corresponding genes in CMs were only modestly higher than  
383 their expression in other cell types (Extended Data Fig. 9a).

384 We performed simulations to investigate the power loss in detecting cell-type-specific eQTLs.  
385 We considered a variant that is an eQTL of a gene in one cell type (“focal” cells). Mathematical  
386 analysis showed that the power of detecting association of this variant with bulk expression  
387 depends on effect sizes of the variant in all cell types, the cell type proportions, and the variance  
388 as well as correlations of gene expression across cell types (Supplementary Notes). Under  
389 simplified assumptions about the variance and correlation of expressions across cell types, and a  
390 cell type mix similar to our heart data, we estimated that, when the focal cells are 30% of the  
391 sample, the power of detecting the eQTL, at sample size 500 and  $p$ -value  $< 1e-3$ , is about 26-88%  
392 (depending on effect size) of the maximum power; and when focal cell proportion is 20%, reduces  
393 to only 8-40% (Extended Data Fig. 9b, Supplementary Notes).

394 In conclusion, our empirical study and power analysis together showed that sharing of cell types  
395 across tissues, and the under-detection of cell-type-specific regulatory variants are two factors  
396 explaining high level of tissue-sharing of bulk eQTLs. The latter factor may also explain the  
397 finding that cis-eQTLs from bulk tissues only mediate 10-20% of disease heritability. Together  
398 our finding points out limitations of current eQTL studies and highlights the need of other  
399 strategies such as single-cell eQTL mapping<sup>81</sup>.

400

## 401 **Discussion**

402 While GWAS have been successful in a range of complex traits, the causal variants, their target  
403 genes, and their mechanisms in disease-related cell types have been elucidated in few cases<sup>48</sup>. In  
404 this work, we established a cell-type-resolved atlas of chromatin accessibility and transcription of  
405 the human heart to study the genetics of heart-related traits, focusing on AF<sup>3-5</sup>. We statistically  
406 fine-mapped AF-associated loci, and experimentally validated some of the candidate variants.

407 Using a novel computational procedure, we identified 45 high confidence genes, implicating key  
408 biological processes, in particular TFs and signaling pathways important for heart development.  
409 Motivated by our observation that the putative AF variants often were not colocalized with eQTLs,  
410 we investigated how heart eQTLs are shared across tissue types. Our analysis suggests that eQTLs  
411 with cell-type-specific effects are under-detected and that this is likely a factor explaining both  
412 high tissue-sharing of eQTLs and the lack of eQTLs in GWAS variants.

413 Single-cell epigenomics has been used to aid the genetic studies of several common diseases,  
414 including AF<sup>82–85</sup>. These studies, however, often aimed to assess the key cell types of diseases of  
415 interest and fell short of comprehensive discovery of disease-causing variants and genes. A unique  
416 strength of our work is that it takes full advantage of the single-cell data to identify candidate risk  
417 variants and genes. Our computational procedure leverages strong enrichment of genetic signals  
418 in CM-specific OCRs to fine-map causal variants, greatly increasing the number of high  
419 confidence SNPs<sup>82</sup> (Fig. 4b). Our gene-mapping procedure effectively leverages fine-mapping  
420 results and multiple sources of information linking SNPs to putative targets. This avoids the bias  
421 of previous work that only considers one metric, e.g., distance, to link SNPs to genes, and increases  
422 the sensitivity of detecting risk genes. As a result, we found high confidence genes (PIP  $\geq$  0.8) in  
423 more than 1/3 of known AF-associated loci.

424 Our set of 45 candidate genes shed light on the genetics of AF. Earlier linkage studies implicated  
425 ion channels and structural proteins, as well as a few TFs<sup>86</sup>. Our results confirmed these earlier  
426 findings and showed an even larger role of regulatory genes, including TFs and signaling proteins.  
427 In total, we identified 7 TFs with PIP  $\geq$  0.8 (Supplementary Table 7), and 18 at PIP  $\geq$  0.5. These  
428 included known AF genes, *TBX5* (PIP 0.99), *NKX2-5* (0.99), *PITX2* (0.9), *ZFHX3* (0.84) and  
429 *GATA4* (0.57), as well as TFs with roles in heart development such as *HAND2* (0.87), *ZEB2* (0.98),  
430 and *PRRX1* (0.74). Our results also highlighted signal transduction pathways, including MAPK  
431 signaling<sup>75</sup>, Ephrin signaling<sup>76–78</sup> (Fig. 5h), G-protein coupled receptor signaling<sup>87</sup>, Wnt signaling<sup>88</sup>  
432 (Supplementary Table 11) and FGF signaling<sup>61,62</sup> (*FGF9*, PIP = 0.94 and *FGF5* PIP = 0.53), all  
433 previously implicated in heart development.

434 Despite the advances described above, our study has a few limitations. Our experimental data  
435 were limited to four anatomical locations of the ventricles, while some AF risk variants might act  
436 through atrial-specific CMs. However, it is worth noting that a recent study, using scRNA-seq  
437 based cellular atlas of the heart including all anatomic locations, found that AF candidate genes



438 were strongly enriched in ventricular CMs<sup>20</sup>. Additionally, our fine-mapping leveraged the almost  
439 exclusive enrichment in CM-specific OCRs (Fig. 4a), and thus may miss variants acting on the AF  
440 risk through other cell types. This possibility is suggested by a small number of candidate variants  
441 showing accessibility specific to fibroblasts (Fig. 4g), known contributors to AF etiology<sup>89</sup>.  
442 Finally, some disease variants potentially act transiently during development and might be missed  
443 using adult heart samples.

444 Our investigation of tissue-sharing patterns of *cis*-eQTLs found that heart eQTLs located in  
445 OCRs were dominated by those with likely broad effects across cell types (Fig. 6de). This result  
446 may reflect the limited power of bulk eQTLs in detecting eQTLs acting on a low proportion of  
447 cells, a finding supported by our power analysis. As additional support, studies using both sorted  
448 cell types<sup>90</sup> and single-cell technology<sup>91,92</sup> have shown that cell-type-specific eQTLs are common.

449 There are some caveats to our eQTL study. We interpreted the higher enrichment of heart eQTLs  
450 in shared OCRs compared to cell-type specific OCRs (Fig. 6de) as the difference of detection  
451 power. The assumption was that eQTLs from the two groups have similar effect sizes. However,  
452 this assumption could be violated. Another caveat is that in our power analysis we assumed that  
453 the variance of gene expression across samples is identical across cell types. This reflects the  
454 limitation of our knowledge. Further work using single-cell RNA-seq or sorted cell populations  
455 may better inform the power analysis.

456 In conclusion, by combining novel experimental and computational approaches, our study  
457 identified a number of risk variants and genes and revealed key insights of the genetics of AF.  
458 These data provide a rich resource for future functional studies. Importantly, our analytic  
459 framework, including the software for fine-mapping and risk gene identification, may provide a  
460 general model for the study of other complex phenotypes.

461

462

463

464

465

466

467 **Methods**

468

469 **Data collection.** *Nuclei isolation from adult heart tissue.* Heart tissue samples were obtained from  
470 National Disease Research Interchange (NDRI) without identifying information. The work with  
471 these samples was determined to be Non-Human subject research and approved by the IRB  
472 committee of the University of Chicago (IRB19-1429). Samples were stored at -80°C and kept on  
473 dry ice whenever outside of the freezer. We included samples from 4 regions (left and right  
474 ventricles, interventricular septum, apex) from 3 male individuals (Supplementary Table 1).  
475 Aliquots of each heart sample were prepared from frozen heart tissue using a tissue pulverizer,  
476 which was cooled prior to pulverization for 20 minutes over dry ice. Aliquots assayed in this study  
477 ranged from 86.7 mg to 141.6 mg. Prior to library preparation, we purified nuclei using  
478 fluorescence-activated cell sorting (FACS) to remove debris and minimize contamination from  
479 ambient RNA.

480 Single nuclei isolation was performed on the heart tissue aliquots as described in Litvinukova  
481 *et al.* 2020<sup>20</sup>, with some modifications. Single heart aliquots were kept on dry ice until being  
482 transferred into a precooled 2 mL dounce homogenizer (Sigma) with 2 mL homogenization buffer  
483 (250 mM sucrose, 25 mM KCl, 5 mM MgCl<sub>2</sub>, 10 mM Tris-HCl, 1 mM dithiothreitol (DTT), 1x  
484 protease inhibitor, 0.4 U/μl, RNaseIn, 0.2 U/μl SUPERaseIn, 0.1% Triton X-100 in nuclease-free  
485 water). Samples were dounced 25 times with pestle A (loose) and 15 times with pestle B (tight),  
486 filtered through a 40-μm cell strainer, and centrifuged (500g, 5 minutes, 4°C). Supernatant was  
487 discarded and the nuclei pellet was suspended in nuclei resuspension buffer (1x PBS, 1% BSA,  
488 0.2 U/μL RNaseIn) and stained with NucBlue Live ReadyProbes Reagents (ThermoFisher).  
489 Hoechst-positive nuclei were enriched using fluorescence-activated cell sorting (FACS) on the  
490 FACSaria (BD Biosciences), obtaining between 172,500 and 350,000 nuclei while targeting a  
491 maximum of 350,000. Nuclei were sorted into 0.75 ml of resuspension buffer. Flow-sorted nuclei  
492 were counted in a C-Chip Disposable Hemocytometer, Neubauer Improved (INCYTO) before  
493 commencing with library preparation.

494  
495 *snRNA-seq library preparation and sequencing.* A portion of the sorted nuclei suspension was  
496 removed and brought to a concentration of between 700 and 1,200 nuclei per microliter. An  
497 appropriate number of nuclei were loaded on the Chromium controller (10X genomics) in order to  
498 target between 6,000-8,000 nuclei, according to V3 of the manufacturer's instructions for the  
499 Chromium Next GEM Single Cell 3' Reagent Kits (10X Genomics)<sup>93</sup>. 3' gene expression libraries

500 were amplified with 15 cycles during sample index PCR. QC was performed on 3' gene expression  
501 cDNA and final libraries using a Qubit Fluorometer (ThermoFisher) and an Agilent 2100  
502 Bioanalyzer (Agilent). Libraries were sequenced on the NovaSeq 6000 (Illumina) or the NextSeq  
503 500 (Illumina) at the University of Chicago's Genomics Facility using paired-end sequencing.

504  
505 *scATAC-seq library preparation and sequencing.* scATAC-seq libraries were prepared according  
506 to v1 of the manufacturer's guidelines for the Chromium Next GEM Single Cell ATAC Reagent  
507 Kits (10X Genomics), with the modification that we started from nuclei that were isolated as  
508 described above. Between 9,300 and 25,000 nuclei were tagged using Transposition Mix (10X  
509 Genomics) at 37°C for 1 h and loaded on the Chromium controller. We targeted between 6,000  
510 and 10,000 nuclei for library preparation. QC was performed on final ATAC-seq libraries using a  
511 Qubit Fluorometer and an Agilent 2100 Bioanalyzer. Libraries were sequenced on the  
512 NovaSeq6000 or the NextSeq500 at the University of Chicago's Genomics Facility using paired-  
513 end sequencing.

514  
515 **Single-cell genomic data analysis.** *snRNA-seq pre-processing.* FastQ files from 12 sequencing  
516 experiments were individually processed using an in-house scRNA-seq pipeline dropRunner<sup>94</sup>.  
517 Briefly, dropRunner utilizes FastQC<sup>95,96</sup> to obtain quality control metrics followed by fast and  
518 efficient alignment to human reference genome hg38 using STARsolo 2.6.1<sup>97</sup> in GeneFull mode  
519 with other parameters set to default. STARsolo performs alignment and quantification of gene  
520 expression in one package. We quantified expression at the gene level using Gencode v29 gene  
521 annotations<sup>98</sup> utilizing both intronic and exonic reads to improve clustering and downstream  
522 analyses of the snRNA-seq data. We extracted the raw gene-by-barcode expression matrices output  
523 by STARsolo for downstream analyses. We used Seurat 3.2.1<sup>99</sup> in R 3.6.3 to analyze the snRNA-  
524 seq data. We combined all 12 expression matrices into a single Seurat object together with the  
525 corresponding metadata such as donor and anatomical region. To filter low-quality nuclei, we  
526 removed barcodes that contained less than 1000 UMI. We also used DoubletFinder 2.0.3<sup>100</sup> with  
527  $pN = 0.015$  and  $pK = 0.005$  to account for doublets, which works by generating in-silico doublets  
528 and performs clustering to identify nuclei that fall in the neighborhood of the generated doublets.  
529 After quality control, we retained a total of 49,359 nuclei.

530

531 *scATAC-seq pre-processing.* FastQ files from 12 sequencing experiments were individually  
532 processed using 10x Genomics CellRanger-atac 1.2.0<sup>101</sup>. We used the command cellranger-atac  
533 count to align the fastq files to human reference genome hg38, followed by marking and removing  
534 duplicate reads, and producing a fragment file containing the mapped location of each unique  
535 fragment in each nucleus. We used ArchR 0.9.5<sup>31</sup> to further pre-process the data and perform  
536 downstream analyses of the scATAC-seq data. Using ArchR, we converted the fragments file into  
537 a tile matrix, which is a bin-by-barcode Tn5 insertion count matrix, using a bin-size of 500 bp. We  
538 also generated a gene score count matrix using the "model 42" from ArchR, which aggregates Tn5  
539 insertion signals from the entire gene body, scales signals with bi-directional exponential decays  
540 from the TSS (extended upstream by 5 kb) and the transcription termination site, and accounts for  
541 neighboring gene boundaries. Gene annotations were obtained from Gencode v29. To filter low  
542 quality nuclei, we kept nuclei with at least 5,000 unique fragments and a TSS enrichment score of  
543 6. We also used ArchR's doublet removal approach with default parameters, which is based on in-  
544 silico doublet generation. We removed nuclei with a doublet enrichment score greater than 1. After  
545 quality control, we retained a total of 26,714 nuclei.

546

547 *Cell-type identification from snRNA-seq and scATAC-seq.* We performed normalization,  
548 dimensionality reduction, and unsupervised clustering on snRNA-seq and scATAC-seq data in  
549 order to identify cell-types. For snRNA-seq, we used Seurat's workflow which begins with  
550 converting counts to log<sub>2</sub> TP10k values using the NormalizeData function. Next, we found the top  
551 2000 variable genes using FindVariableGenes and used these genes as input features for Principal  
552 Component Analysis (PCA). We computed the top 30 principal components (PCs) for each cell  
553 and used these for downstream analyses. We observed batch effects due to different donors, and  
554 corrected this batch effect. This was done using the RunHarmony function from the Harmony  
555 1.0<sup>102</sup> package with default parameters to regress out the donor variable from the PCs. Next, we  
556 used the FindClusters in Seurat with a resolution of 0.2 on the harmony-corrected PCs to define  
557 clusters. We also computed the corresponding UMAP to visualize the harmony-corrected PCs in  
558 two dimensions. We used previously established cell-type markers in order to map clusters to cell  
559 types<sup>20,21</sup>.

560 We performed cell-type mapping for scATAC-seq using the ArchR package. We performed  
561 dimensionality reduction on the tile matrix using the top 20,000 bins in terms of count across all

562 cells. We used the function `addIterativeLSI` with 2 iterations in order to perform latent semantic  
563 indexing (LSI) on the scATAC-seq tile matrix and retained the top 50 LSI vectors. Similar to  
564 snRNA-seq, we observed batch effects across different donors, and removed this effect using the  
565 `RunHarmony` function. We used `addClusters` with `resolution = 0.2` in order to cluster nuclei based  
566 on the harmony-corrected LSI vectors. `addUMAP` with `min.dist = 0.4` was used to compute a 2-  
567 dimensional representation of the harmony-corrected LSI vectors. We visualized gene activity  
568 scores, as defined in ArchR, using the same marker genes as in snRNA-seq to assign clusters to  
569 cell-types.

570

571 **Defining and classifying open chromatin regions.** Insertion read counts were aggregated across  
572 all cells in each cell-type to form a cell-type pseudo-bulk and peak calling was performed on  
573 pseudo-bulk data of each cell-type. Using the function `addReproduciblePeakSet` in ArchR in  
574 conjunction with MACS2<sup>103</sup>, a union set of 352,900 peaks were called in total across all cell-types  
575 at FDR < 0.1. This set of peaks, called union set, were used for all downstream analyses.

576 In order to discover cell-type specific regulatory elements, a single-cell insertion count matrix  
577 was created using the function `addPeakMatrix` in ArchR. Cells were grouped into their respective  
578 cell-types and differential accessibility (DA) analysis was performed in a one-vs-all fashion, i.e.,  
579 one cell type vs. all other ones. To perform DA, we used `getMarkerFeatures` in ArchR with default  
580 parameters, which uses the Wilcoxon rank-sum test on the log-normalized insertion count matrix.  
581 To control for technical variation, cells from the cell-type group and the group of remaining cell  
582 types are matched in terms of TSS enrichment and number of fragments. Using FDR < 10% and  
583  $\log_2$  fold-change > 1, we found about 47% of the union set to be cell-type specific.

584 For OCRs that were not differentially accessible, we reasoned that these are more likely to be  
585 shared. To further stratify these OCRs into different classes, based on sharing among different cell  
586 types, we used a simple quantile-based method. First, we aggregated the ATAC-seq counts across  
587 all cells within each cell-type for each non-DA peak and normalized the counts by the total sum  
588 of counts in each cell-type. Next, we binarized the peaks within each cell-type based on whether  
589 they are in the top 25% or not in terms of their normalized counts. In this way, we identify the top  
590 25% accessible peaks in each cell-type. Finally, we count how many times a peak is 1, or highly  
591 accessible, across cell-types. Through this strategy, we defined three disjoint sets: shared in 2-3  
592 cell types, shared in 4+ cell types and the remaining peaks denoted as “non-DA”. The last category

593 corresponds to peaks that are only highly accessible (top 25%) in one cell type but are not found  
594 to be differentially accessible based on our criteria above.

595

596 **Identifying putative TFs regulating chromatin accessibility.** We used a set of 870 human motif  
597 sequence instances from CisBP<sup>104</sup>. These motif annotations were added onto the ArchR object  
598 using the addMotifAnnotations function. Next, enrichment analysis was performed for each motif  
599 in each cell-type-specific set of peaks, using the peakAnnoEnrichment function in ArchR. The  
600 function uses the hypergeometric test to assess the enrichment of the number of times a motif  
601 overlaps with a given set of peaks, compared to random expectation. After correcting for multiple  
602 testing within each cell-type, we used  $FDR < 1\%$  to ascertain a set of motifs and their enrichment.

603 Motif enrichment analysis may find multiple TFs with similar motifs. To reduce the redundancy  
604 and identify true TFs that drive gene regulation, we correlated the motif accessibility with gene  
605 score activity of each TF, expecting that for true TFs, their expression levels should be positively  
606 correlated with accessibility of their motifs across cells. We obtained motif accessibility scores  
607 from chromVAR (using the addDeviationsMatrix function in ArchR) for each TF across all cells.  
608 We obtained the corresponding TF gene activity scores using the “model 42” by ArchR (see  
609 “scATAC-seq pre-processing”). These single-cell-level motif accessibility scores and gene scores,  
610 however, are noisy given the sparsity of data at individual cells. We thus used a strategy similar to  
611 Cicero<sup>105</sup>, by aggregating cells into “metacells” based on similarity using a  $k$ -nearest neighbor  
612 approach. Specifically, we found the  $k$  nearest neighbors to each cell using the LSI vectors of the  
613 single-cell ATAC-seq data. We only retained sets of metacells that shared a maximum of 25% of  
614 constituting cells. Metacells that shared more than 25% of cells were removed at random. Using  $k$   
615 = 100, we created about 200 non-redundant meta-cells based on these criteria and averaged the  
616 motif accessibility scores and gene scores across cells within each meta-cell. We then computed  
617 Pearson’s correlation between the gene scores and the motif accessibility scores across meta-cell.  
618 We selected all TFs with a Pearson’s correlation greater than 0.5.

619

620 **Testing enrichment of GWAS risk variants in functional annotations.** We obtained  
621 harmonized GWAS summary statistics for cardiovascular and some non-cardiovascular traits from  
622 the IEU OpenGWAS project. We removed SNPs with missing values, SNPs on non-autosomal



623 chromosomes, and indels. Utilizing approximately independent Linkage Disequilibrium (LD)  
624 blocks generated by ldetect<sup>37</sup>, we assigned each SNP to one of 1700 LD blocks.

625 We used TORUS<sup>36</sup> to estimate the genome-wide enrichment of risk variants of GWAS traits in  
626 various functional annotations, including cell-type specific OCRs obtained from DA testing, and  
627 some generic annotations including coding, retrieved from UCSC Genome Browser database, and  
628 conserved sequences from Lindblad-Toh, K. *et al.* 2011<sup>106</sup>. We ran TORUS on each annotation,  
629 one at a time, to get the marginal enrichment reported in Fig. 4a. P-values for enrichment were  
630 estimated from the 95% confidence intervals returned by TORUS and were adjusted for multiple  
631 testing across all traits/cell-types using the Benjamini-Hochberg approach.

632

633 **Fine-mapping causal variants in AF-associated loci.** We used SuSiE<sup>107</sup> to perform functionally-  
634 informed fine-mapping. We used the susie\_rss function to fine-map each LD block, which takes  
635 GWAS z-scores and an LD matrix for the SNPs in the block. Because only summary statistics  
636 were available publicly, we used out-of-sample genotype information from 1000 Genome  
637 Project<sup>108</sup> to construct LD matrices. We ran SuSiE with  $L = 1$ , which allows a single causal signal  
638 for each LD block and is robust to mismatching LD patterns. We allow SNPs to have different  
639 prior probabilities in fine-mapping. These prior probabilities were generated by TORUS using a  
640 joint-model of the following annotations: CM specific ATAC, CM shared ATAC, non-CM ATAC,  
641 UCSC conserved/coding. We fine-mapped a total of 122 LD blocks, each containing at least 1  
642 SNP at genome-wide significance ( $P < 5 \times 10^{-8}$ ).

643

644 **Annotating putative AF causal variants with additional functional data.** Fetal DHS and heart  
645 H3K27ac data were obtained from ENCODE. PC-HiC interactions were obtained from an earlier  
646 study conducted in iPSC derived CMs<sup>41</sup>. Only interactions found in at least 2 out of 3 replicates  
647 were included. Motif analysis was performed using R motifbreak package<sup>109</sup>. Only “strong”  
648 effects on motif scores, according to the package, were considered.

649

650 **Assessing regulatory effects of candidate variants by Luciferase assay.** Candidate regulatory  
651 elements were designed from CM-specific accessibility in hg38 and synthesized by IDT, with  
652 either the reference allele or SNP allele(s). Sequence was verified and then cloned into the  
653 pGL4.23 enhancer luciferase response vector with a minimal promoter. HL-1 cardiomyocytes

654 were co-transfected with luciferase response vector and a pRL control using Lipofectamine 3000,  
655 cultured for 48 hr after transfection, then lysed and assayed using the Dual-Luciferase Reporter  
656 Assay system (Promega).

657

658 **Gene mapping procedure with Mapgen.** We used the posterior inclusion probabilities (PIPs)  
659 generated by SuSiE to calculate a gene-level PIP, reflecting the probability that a gene is a risk  
660 gene. We assume there is a single causal gene per disease associated locus. Let  $Z_g$  be an indicator  
661 variable describing whether gene  $g$  is causal ( $Z_g = 1$ ) or not ( $Z_g = 0$ ) for the trait. Assuming a single  
662 causal SNP per locus, the probability that the gene is causal, which is denoted as “gene PIP”, can  
663 be then related to the probabilities of SNPs being causal variants:

664

$$665 \quad P(Z_g = 1 | D) = \sum_i P(Z_g = 1 | \gamma_i = 1) P(\gamma_i = 1 | D),$$

666

667 where  $\gamma_i$  is the indicator variable for whether SNP  $i$  is causal or not, and  $D$  is the GWAS summary  
668 statistics. The term  $P(Z_g = 1 | \gamma_i = 1)$  is the probability that  $g$  is the causal gene if the causal SNP  
669 is SNP  $i$ , and the term  $P(\gamma_i = 1 | D)$  is simply the PIP of SNP  $i$ , or  $\text{PIP}_i$ . So the gene PIP of a gene  
670 is a weighted sum of PIPs of all SNPs, weighted by how much that gene is supported by each SNP  
671 (see below). Since the PIPs of all SNPs in a block sum to 1, the gene PIP has an upper-bound of  
672 1. In the rare cases where a gene spans two nearby blocks - e.g. when a gene has large introns, the  
673 gene PIP may exceed 1, which can be interpreted as the expected number of causal variants  
674 targeting the gene  $g$ .

675 To calculate the term  $P(Z_g = 1 | \gamma_i = 1)$ , we consider the location of the SNP  $i$  with relation to  
676 the gene  $g$ , as well as functional genomic data linking SNP  $i$  with gene  $g$ . These data were used to  
677 assign the weights, denoted as  $w_{ig}$ , between SNP  $i$  and gene  $g$ , reflecting how likely the SNP  $i$   
678 affects gene  $g$ . For example, if a SNP is inside an exon of a gene, then the SNP-gene will have  
679 weight 1. We note that  $w_{ig}$  and  $P(Z_g = 1 | \gamma_i = 1)$  have different semantics: it is possible that a  
680 SNP affects multiple genes with weights all equal to 1, but there is only a single causal gene  
681 supported by any SNP. In other words, for a causal SNP  $i$ , the conditional probabilities  $P(Z_g =$   
682  $1 | \gamma_i = 1)$  should sum to 1 across all nearby genes  $g$ . So we need to normalize  $w_{ig}$  with:

683

$$PP(Z_g = 1 | \gamma_i = 1) = \frac{w_{ig}}{\sum_g w_{ig}}$$

684  
685 To assign the weight terms,  $w_{ig}$ , we follow these four steps capturing several scenarios where a  
686 SNP may affect a gene: **1)** If a SNP is in an exon or active promoter (promoter overlapping with  
687 OCR) of a gene, we assign the SNP to that gene with weight  $w_{ig} = 1$ . **2)** If a SNP can be linked  
688 to a gene's promoter via "enhancer loops", we assign the linked gene with weight  $w_{ig} = 1$ . Here,  
689 "enhancer loops" are defined based on Activity-By-Contact (ABC) scores (constructed from heart  
690 ventricle data with ABC scores  $\geq 0.015$ )<sup>44</sup> and promoter-capture HiC data (from iPSC-CMs)<sup>41</sup>.  
691 Considering the fact that Hi-C and PC-HiC may miss contacts between close regions due to  
692 technical reasons, we also consider a SNP in OCR within 20 kb of an active promoter as an  
693 "enhancer loop". **3)** If a SNP is in a UTR but not in OCRs, suggesting that the SNP likely regulates  
694 the containing gene through RNA processing mechanisms, e.g. RNA stability or alternative  
695 polyadenylation, we will assign the SNP to the UTR-containing gene with weight  $w_{ig} = 1$ . **4)** If  
696 a SNP is not linked to any gene via the criteria above, we use a distance-based weighting to assign  
697 it to all genes within 1Mb. The weights follow an exponential decay function as below, where  
698  $d_{ig}$  is the SNP-gene distance:

$$699 \quad w_{ig} = e^{-d_{ig}/5 \times 10^4} .$$

700 The parameter of this weight function, 50 kb, was chosen based on the fact that most enhancers,  
701 estimated to be 84% using CRISPR deletion experiments<sup>110</sup>, are located within 100 kb of the target  
702 promoters. Using a weight of 50 kb here would lead to 87% of weights within 100 kb, with a  
703 simple area-under-curve calculation of the weight function above.

704 At any locus, having PIPs for all the genes in the locus allows us to define the "credible gene  
705 set" of the locus, much like the use of the term for SNPs<sup>107</sup>. Simply speaking, the credible set at  
706 the 80% level means the minimum set of genes in the locus whose sum of PIPs is greater than or  
707 equal to 80%. One complication is that some of the genes in the locus may span another nearby  
708 locus, as described above. In this case, while the final reported gene PIP is computed from both  
709 loci, we only use the PIP of the gene from the locus of interest to define the credible gene set of  
710 that locus.

711  
712 **Gene interaction network analysis.** We used the STRING database (STRING) 11.5<sup>111</sup> to  
713 construct gene network. The analysis was done using Cytoscape 3.8.2<sup>112</sup>. The input genes are those  
714 at PIP  $\geq 0.5$  from our gene-mapping analysis. To create the gene network (Fig. 5h), we use all

715 default settings except that we use the recommended threshold for high-confidence interactions  
716 (0.700) for interaction scores. Singletons, i.e., genes not having any interactions with other ones,  
717 were not shown from the output network. We also used STRING to run functional enrichment  
718 analysis based on sources including Gene Ontology<sup>113,114</sup>, Reactome Pathways<sup>115</sup> and KEGG<sup>116</sup>.

719  
720 **eQTL tissue sharing analysis.** We started with the rationale of our eQTL tissue sharing analysis.  
721 For simplicity, consider eQTLs found in one tissue (heart in our case), and we study the sharing  
722 of these eQTLs in a second tissue. Let  $p$  denote the probability of eQTLs in the first tissue being  
723 shared in the second tissue. Assuming we have several functional categories of eQTLs, e.g.  
724 regulatory elements specific in a cell type, or shared across cell types, we can then break down  $p$   
725 into several categories with the simple relation:

$$726 \quad p = \sum_c p_c w_c,$$

727 where  $c$  denotes a category,  $p_c$  is the probability of tissue sharing in eQTLs from category  $c$ , and  
728  $w_c$  is the proportion of eQTLs in category  $c$ . We hypothesize that different eQTLs categories have  
729 distinct molecular mechanisms of modulating transcript levels, and thus different tissue sharing  
730 patterns. This simple analysis thus suggests that both  $w_c$  and  $p_c$  are important for our understanding  
731 of tissue sharing. For instance, some categories may have a highly tissue-specific pattern (low  $p_c$ ),  
732 but may constitute a small proportion of all eQTLs (low  $w_c$ ), thus these categories would have  
733 limited contribution to the overall level of tissue sharing among eQTLs.

734  
735 *Summary statistics of GTEx heart eQTLs.* Summary statistics of eQTLs from the left ventricle  
736 were obtained from the GTEx v8 release<sup>14</sup>. We also obtained fine-mapping results using DAP-  
737 G<sup>38</sup>. The variants with posterior inclusion probability (PIP) greater than 0.8 were kept for  
738 downstream analyses. We refer to these putative causal variants as eQTLs henceforth. The total  
739 number of eQTL-gene pairs that passed the threshold is 1,216. Tissue sharing data on the same  
740 eQTLs were also obtained from GTEx<sup>14</sup>. These data provide information of whether these heart  
741 eQTLs are also associated with gene expression in the other tissues in GTEx.

742  
743 *Defining functional categories of heart eQTLs.* eQTLs were intersected with genomic features. To  
744 obtain a set of disjoint genomic features, we used a combination of the union peak set and generic  
745 annotations. For generic annotations, the longest transcript was chosen for each gene body, and its

746 corresponding exons, UTRs, and introns were obtained for all protein coding genes. We partitioned  
747 the union peak set into cell-type-specific categories based on the differential accessibility (DA)  
748 analysis, as well as the shared categories defined using the quantile approach, as described earlier.  
749 We note that DA analysis does not guarantee disjoint sets of features. Indeed, we find that cell  
750 types such as lymphoid and myeloid share about 6% of their DA peaks, while CMs share at most  
751 1% with the other cell-types. To make these cell-type DA sets disjoint, we moved any DA peaks  
752 that occurred in multiple cell types from DA analysis, to the “Shared 2-3” and “Shared 4+”  
753 categories (see “Defining and classifying OCRs”) depending on the number of cell types in which  
754 it occurred. A small percentage of peaks (< 1%) were affected by this step. The eQTLs in OCRs  
755 that overlap with exons or UTRs, or eQTLs in non-DA OCRs, are ambiguous to assign, so they  
756 were filtered from our analysis. The eQTLs in intronic OCRs were assigned based on the OCR  
757 categories. Those eQTLs not intersecting with any functional category were designated in an  
758 “unassigned” category.

759

760 *Estimating extent of tissue sharing in different categories of heart eQTLs.* GTEx has performed  
761 eQTL mapping jointly across all tissues. Using these results, we call a SNP an eQTL in a given  
762 tissue, if it passes the local false sign rate (LFSR) threshold of 1%. For any eQTL, we can thus  
763 determine the number of tissues where it is active.

764

765 *Estimating eQTL enrichment in functional categories.* All the fine-mapped heart eQTLs are  
766 assigned to our set of categories. The proportion of eQTLs in each category is then compared with  
767 the expected proportion by chance to obtain enrichment reported in Fig. 6d and 6e. We used  
768 SNPsnap<sup>117</sup> to create a set of random control SNPs that match our eQTLs in LD and minor allele  
769 frequency. The LD data is obtained from the European population genotypes from 1000 Genomes.  
770 We generated 1000 random SNPs which is roughly how many high-confidence eQTLs were used.  
771 The proportion of random SNPs in each category is then used as our estimated proportion by  
772 chance.

773

#### 774 **Data availability**

775 Our snRNA-seq and scATAC-seq data will be deposited to the Gene Expression Omnibus  
776 (GEO).

777

#### 778 **Code availability**

779 Mapgen R package is available from <https://github.com/xinhe-lab/Mapgen>. Code for data  
780 processing and analyses are available at [https://github.com/xinhe-lab/heart\\_atlas](https://github.com/xinhe-lab/heart_atlas).

781

782

783

784 **Acknowledgements:**

785 This work was funded by National Institutes of Health (NIH) grants, R01MH110531  
786 and R01HG010773 (to X.H.), and R21 AI144417-02 (to O.B). This project has been made  
787 possible in part by grant number CZF2019-002431 from the Chan Zuckerberg Initiative DAF, an  
788 advised fund of Silicon Valley Community Foundation. We thank Xuanyao Liu for helpful  
789 comments on the manuscript.

790



791  
792  
793  
794

## Main figures:

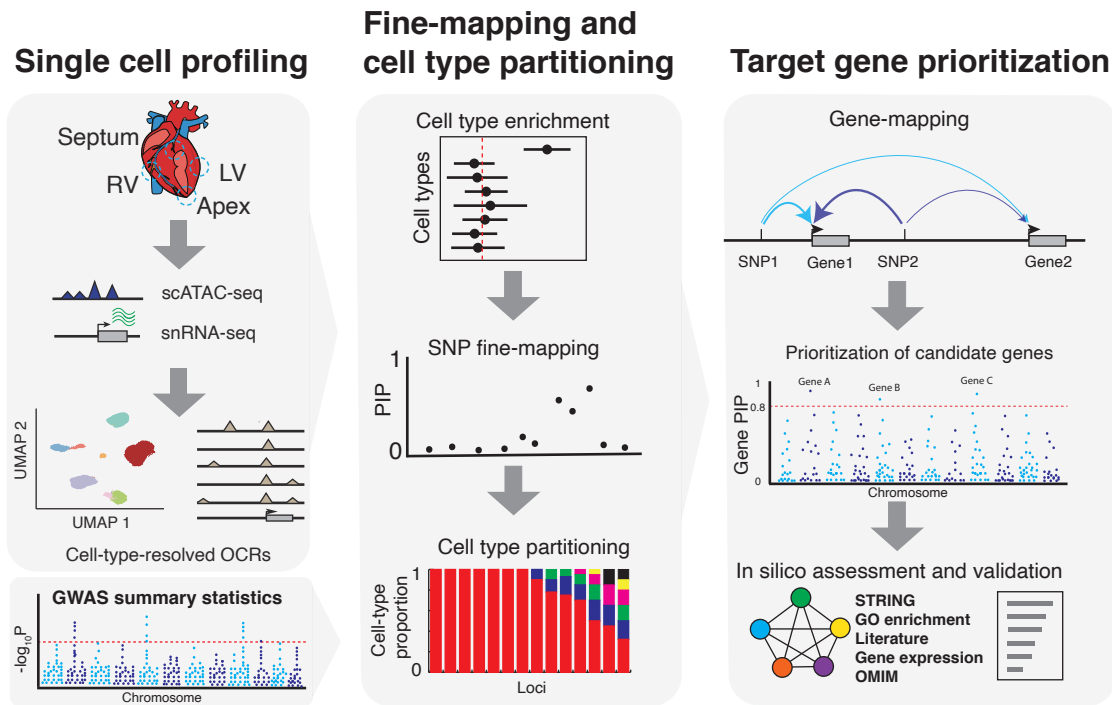

795  
796  
797  
798  
799  
800  
801  
802  
803  
804  
805  
806  
807  
808  
809

**Fig. 1 | Overview of our experimental and computational framework. Left:** SnRNA-seq and scATAC-seq profiling to cluster cells and obtain open chromatin regions (OCRs) in each cell type. **Middle:** Using OCRs and GWAS summary statistics to assess variant enrichment in cell-type-resolved OCRs. The enrichment results then provide prior for Bayesian statistical fine-mapping. The resulting Posterior Inclusion Probabilities (PIPs) represent the probabilities of variants being causal. The likely cell types through which the causal signals at each locus act can be identified by considering cell type information of likely causal variants. We may not always be able to identify a single cell type per locus, so we assign probabilities to cell types. **Right:** Computational gene-mapping using PIPs from SNP fine-mapping and SNP-to-gene links to obtain gene level PIPs. Note that the PIP of a SNP is partitioned into nearby genes in a weighted fashion, with more likely target genes receiving higher weights (as indicated by thicker arrows). Prioritized genes can be further assessed through external evidence such as gene networks and expression.

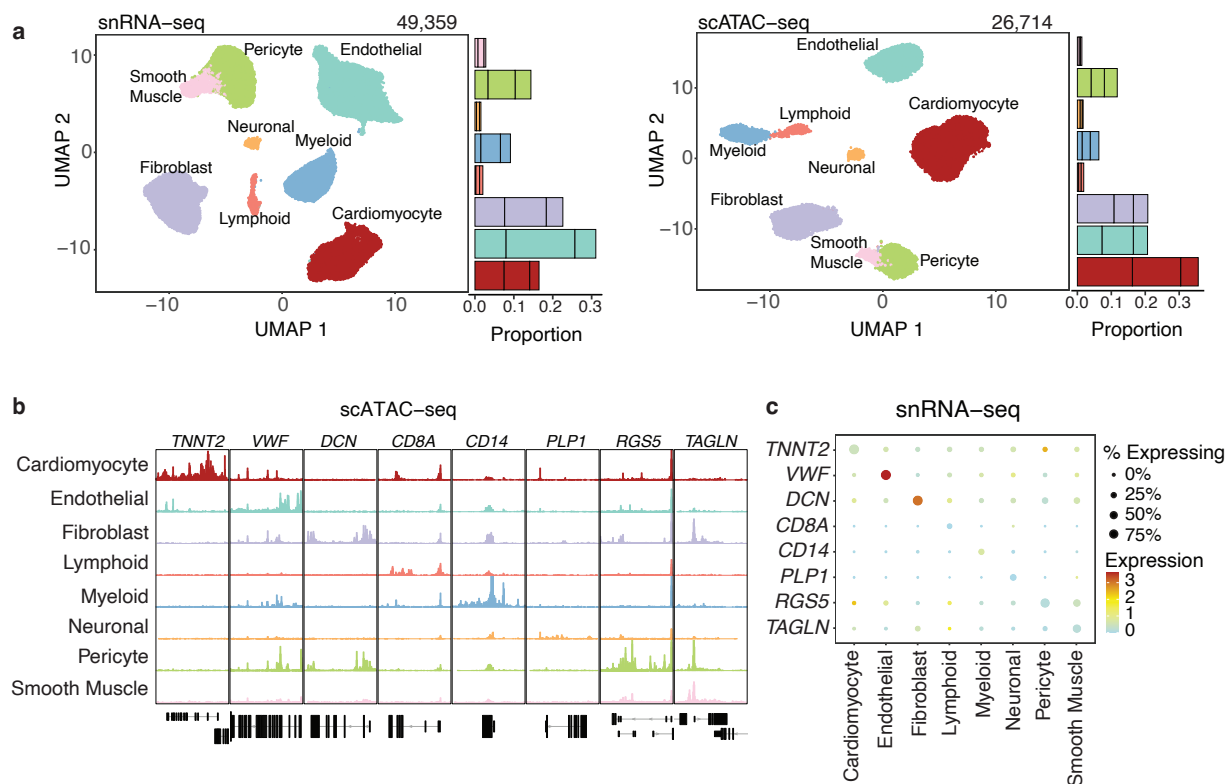

810  
811 **Fig. 2 | Mapping cell types in the human heart.** **a**, UMAP projection of individual cells from  
812 snRNA-seq and scATAC-seq colored by cell types. Stacked barplots on the right represent the  
813 proportions of cell-types from each of the three donors. **b**, Stacked track plots of chromatin  
814 accessibility at marker genes across cell types. The bottom part shows the gene track. **c**, Percent  
815 of nuclei expressing marker genes in each cell type. Colors represent log-normalized expression  
816 values.  
817

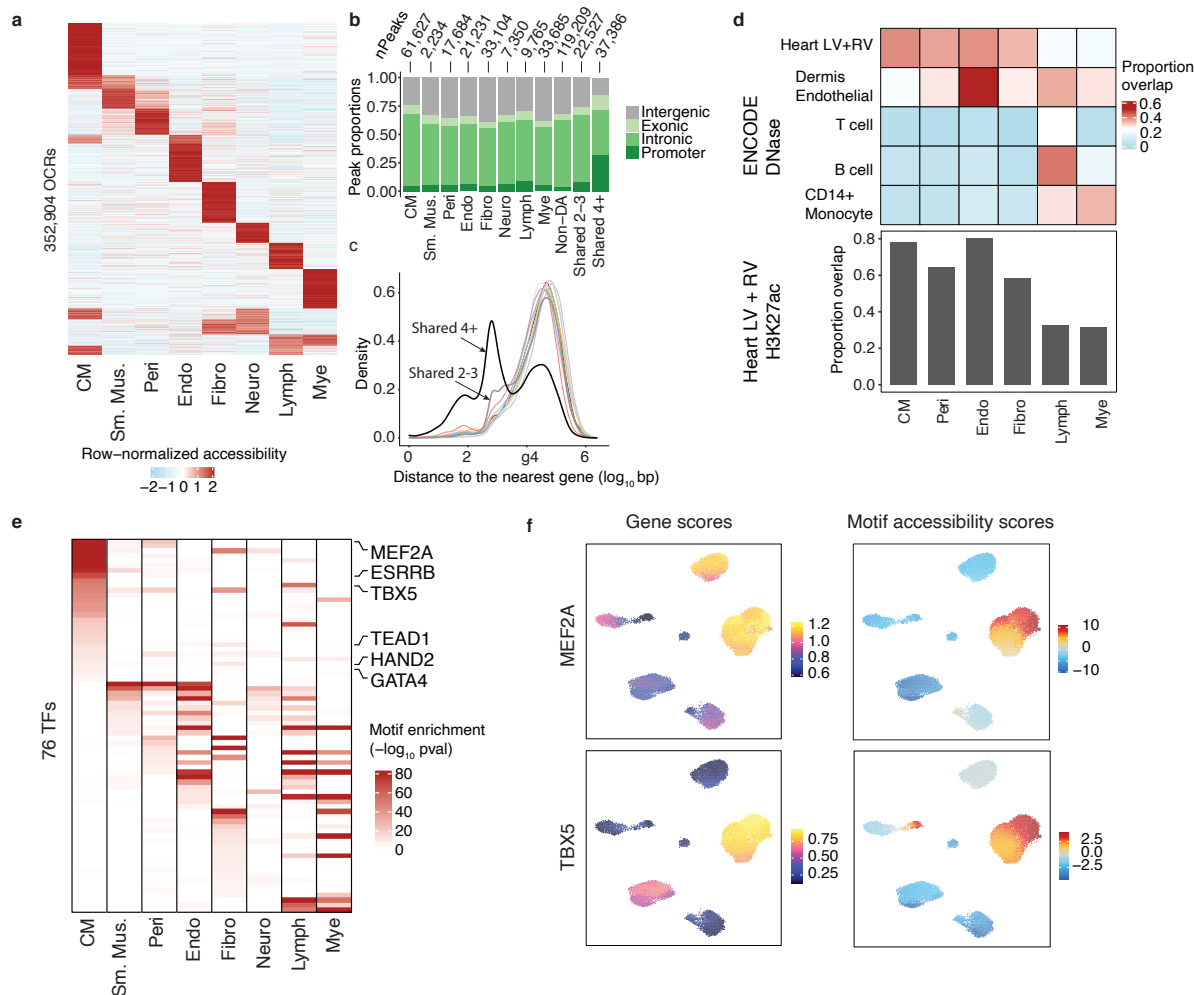

818  
819

820 **Fig. 3 | Discovery of OCRs and transcriptional regulators in the human heart.** **a**, Row-  
821 normalized accessibility of OCRs across all cell types. **b**, Number of cell-type-specific and shared  
822 OCRs and their genomic distributions. **c**, Density plot of the log<sub>10</sub> distance to nearest gene for all  
823 cell-type-specific and shared OCRs. Colors of the lines for cell-type-specific OCRs follow the  
824 same convention as in Figure 2a. Gray and black lines represent shared 2-3 and shared 4 OCRs. **d**,  
825 Proportions of cell-type specific OCRs that overlap with DHS (upper panel). Bar graph (lower  
826 panel) shows the proportions of cell-type specific OCRs that overlap with H3K27ac regions (LV  
827 = left ventricle, RV = right ventricle). Smooth muscle cells and neuronal cells are not shown due  
828 to the small numbers of peaks in these cell types. **e**, Enrichment of TF motifs in the OCRs specific  
829 to each cell type. Shown are 76 TFs with FDR < 1% from motif enrichment analysis in at least one  
830 cell-type, and correlation between motif enrichment and gene activity > 0.5. **f**, Gene scores (from  
831 ArchR) and motif accessibility scores calculated with chromVar in OCRs for MEF2A (top) and  
832 TBX5 (bottom) across all cells.

833  
834  
835  
836

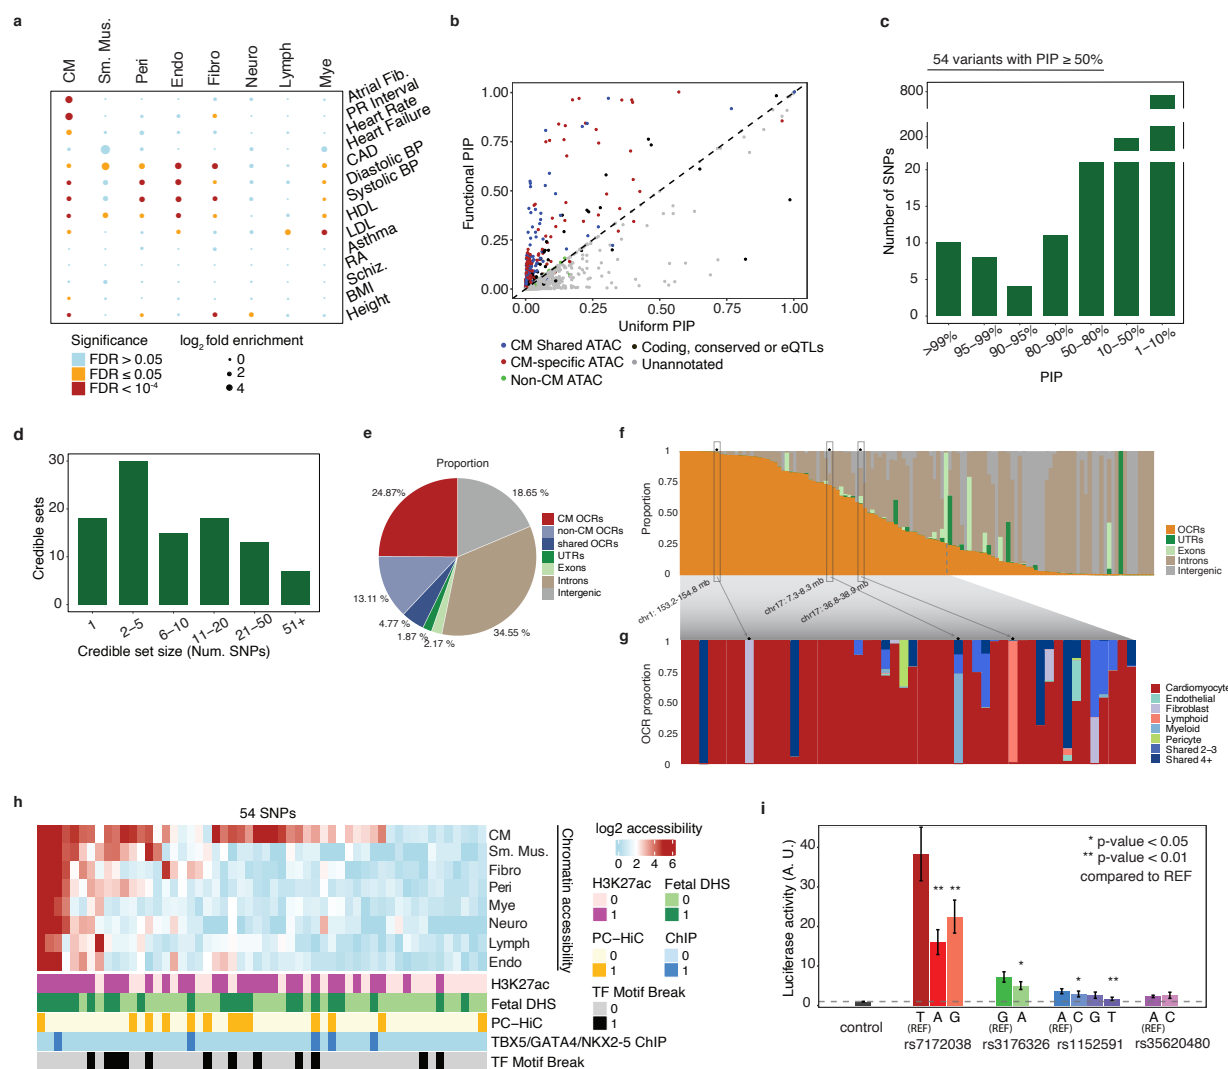

837  
 838 **Fig. 4 | Statistical fine-mapping of loci associated with the AF risk.** **a**, log<sub>2</sub> fold enrichment  
 839 (from the tool TORUS) of risk variants of various traits in cell-type-specific OCRs. **b**, Comparison  
 840 of AF fine-mapping results under the informative prior using OCRs (Y-axis) vs. the results under  
 841 the uniform prior (X-axis). Each dot is a SNP, and color represents the annotation of SNPs. Dashed  
 842 line has a slope of 1. **c**, Summary of PIPs of variants. **d**, Summary of credible set sizes from fine-  
 843 mapping of AF. **e**, Proportions of summed PIPs in disjoint functional annotation categories among  
 844 all the loci. **f**, Proportion of summed PIPs in disjoint functional annotation categories at each  
 845 individual locus. **g**, Proportion of summed PIPs into cell type-specific OCRs at each individual  
 846 locus, for loci with summed PIPs in OCR ≥ 0.25. Highlighted are three loci with high proportions  
 847 in fibroblast, myeloid, lymphoid specific OCRs. **h**, Chromatin accessibility and additional  
 848 functional genomic annotations of 54 SNPs (PIP ≥ 50%). **i**, Reporter activities in HL-1 cells of  
 849 regions containing selected SNPs, with both reference and alternative alleles. P-values were  
 850 calculated using a paired two-sided t-test.

851  
 852

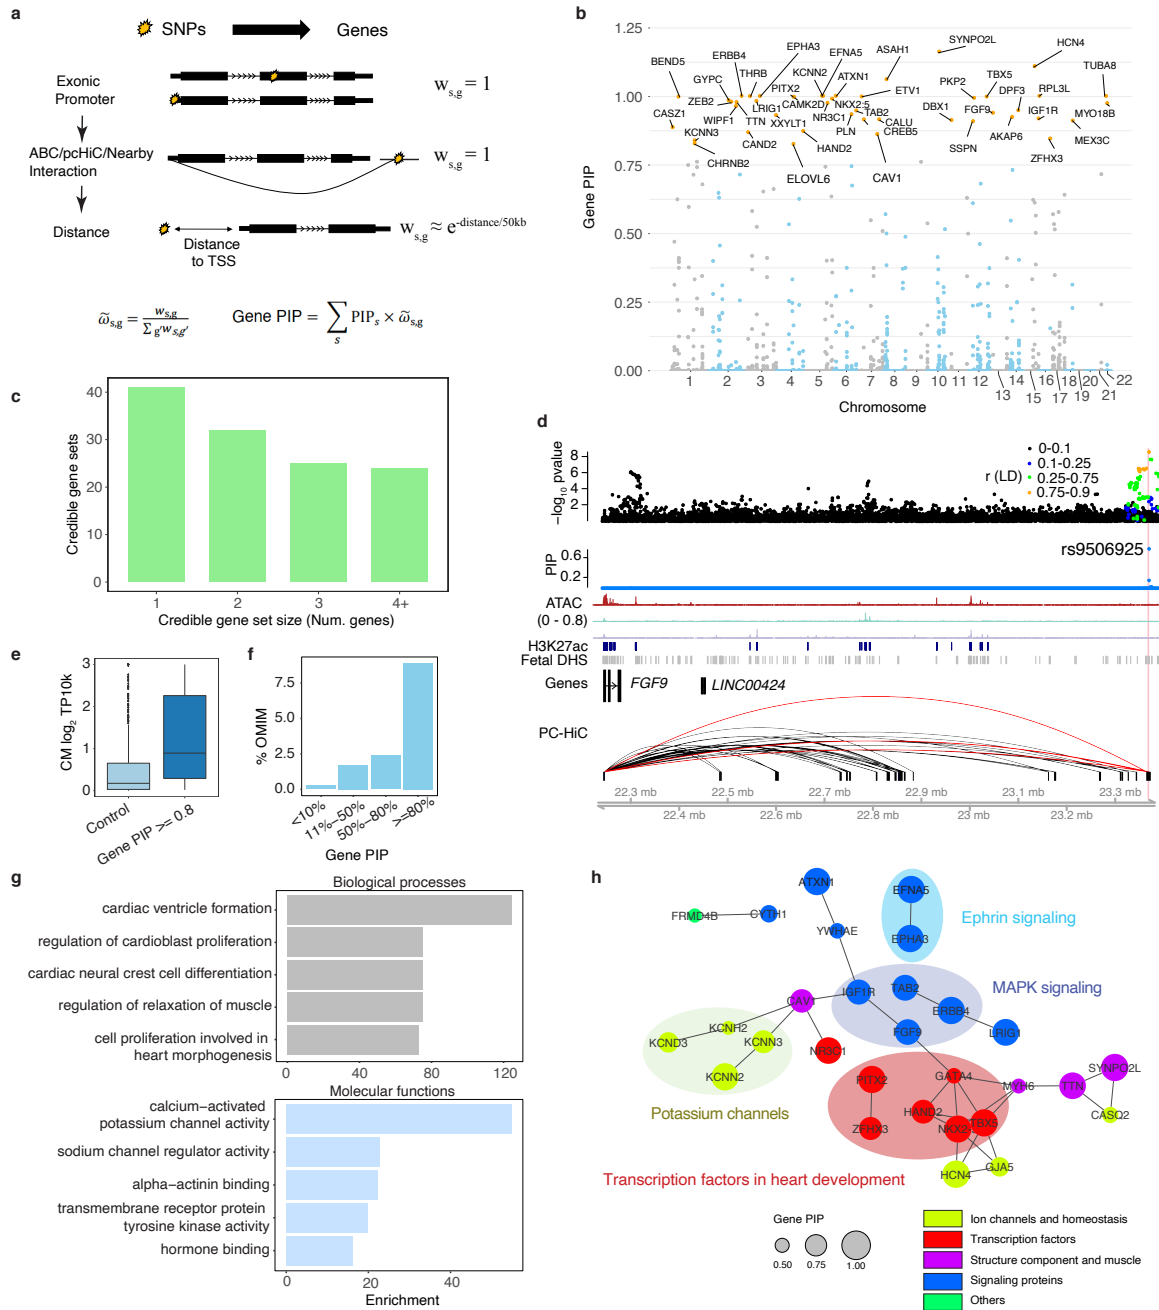

853  
854  
855  
856  
857  
858  
859  
860  
861  
862  
863

**Fig. 5 | Mapping putative risk genes of AF.** **a**, Schematic demonstrating the calculation of gene-level PIPs.  $w_{s,g}$  represents the weight of a gene ( $g$ ) with respect to a SNP ( $S$ ). If a SNP is in exon or promoter of a gene, then the weight is 1 for that gene. If this is not the case, but the SNP can be linked to a target gene via regulatory interactions, we also set weight as 1. If none of these conditions apply, all nearby genes of a SNP receive distance-dependent weights. The weights are then normalized so that the total weight of all genes for a given SNP is 1. See Methods for details. **b**, Manhattan plot of gene PIPs. Genes at  $PIP \geq 0.8$  are labeled. **c**, Summary of the sizes of 80% credible gene sets from gene mapping. **d**, *FGF9* locus: the top two tracks represent the  $-\log_{10}$  p-value of SNPs from AF GWAS (with color representing LD) and their PIPs from SNP-level fine-mapping, respectively. Middle three tracks represent cell-type aggregated ATAC-seq signals (CM:  $0 - 0.8$ ).

864 red, endothelial: green; fibroblast: purple), followed by heart H3K27ac and fetal DHS peak calls.  
865 The links represent interactions identified from promoter-capture HiC data in iPSC-derived CMs.  
866 The red links show interactions centered on the likely causal SNP. **e**, Log-normalized CM  
867 expression of genes at PIP  $\geq$  80% vs. other genes from the AF loci. **f**, Percentage of Mendelian  
868 disease genes from OMIM in each gene PIP bin. **g**, Top 5 Biological Processes (BP) and Molecular  
869 Functions (MF) GO terms from gene-set enrichment analysis of the 45 genes with PIP  $\geq$  80%. **h**,  
870 Gene interaction network of candidate AF genes (PIP  $\geq$  0.5) using STRING. Only genes with  
871 interactions are shown. Interactions are defined using a confidence threshold of 0.7 by STRING.  
872 Node sizes represent gene PIPs. Colors of genes indicate their shared molecular functions.  
873



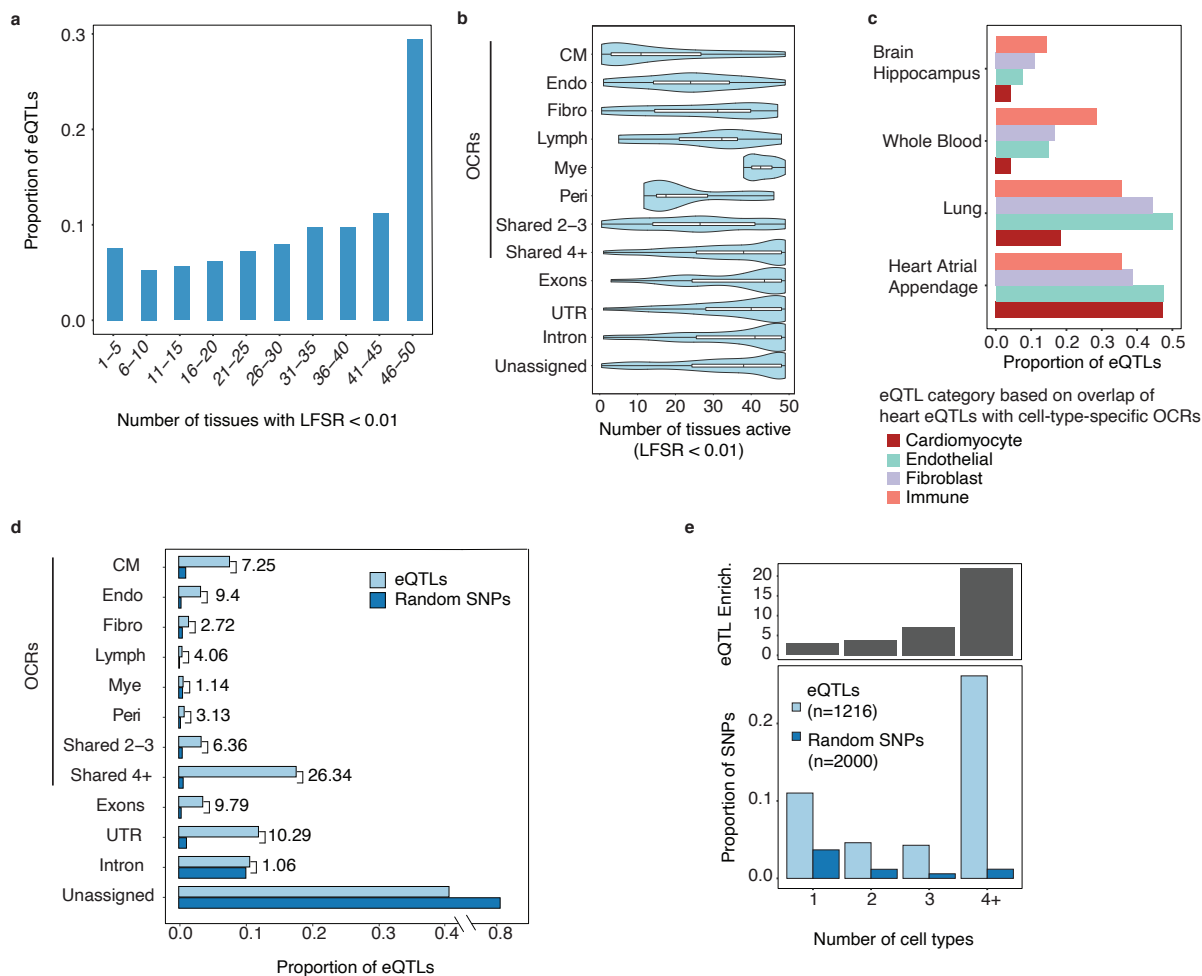

874  
875  
876

**Fig. 6 | Tissue-sharing patterns of heart (LV) eQTLs from GTEx.** **a**, Number of tissues where LV-eQTLs are detected at local false sign rate (LFSR) < 1%. **b**, Violin plot showing the number of tissues in which a specific eQTL is detected. Each row represents a different class of eQTLs, assigned based on their overlap with OCRs categories and other genomic locations. Unassigned: eQTLs that cannot be assigned to any functional class. **c**, Proportion of LV-eQTLs located in OCRs of selected cell types (Cardiomyocytes, Endothelial cells, Fibroblast, and Immune cells) that were also detected as eQTLs in a second tissue. **d**, Proportion of LV-eQTLs (n = 1216) in each functional class. For comparison, the proportions of random SNPs in all the classes are also shown. The numbers near the bars represent the fold enrichment in heart eQTLs compared to random SNPs. **e**, Enrichment of GTEx heart eQTLs in OCRs vary with the number of cell types where the OCRs are active. Lower panel shows the proportion of eQTLs (light blue) and control SNPs (dark blue, chosen to match eQTLs in LD and MAF) overlapping OCRs. The OCRs are divided into 4 categories, based on the degree of sharing across cell types in heart: 1= not shared, 4+= shared in >=4 cell types. The upper panel shows the enrichment of eQTLs in each OCR class compared to expectation based on control SNPs.

892

893 **Table 1 | Top prioritized genes (gene PIP  $\geq$  0.95).**  
894

| Gene           | Gene PIP | Supporting SNPs                                                    | SNP PIP                                   | Link Method*                                   | OMIM | CM-specific expression | Known AF risk gene | Reference                      |
|----------------|----------|--------------------------------------------------------------------|-------------------------------------------|------------------------------------------------|------|------------------------|--------------------|--------------------------------|
| <i>SYNPO2L</i> | 1.161    | rs60632610                                                         | 0.959                                     | exon                                           |      |                        | ✓                  | [20215401, 33768119]           |
| <i>HCN4</i>    | 1.108    | rs7172038                                                          | 0.959                                     | ABC                                            | ✓    |                        | ✓                  | [29987112]                     |
| <i>ASAH1</i>   | 1.061    | rs7508                                                             | 1                                         | exon                                           |      | ✓                      |                    | [32015399]                     |
| <i>ATXN1</i>   | 1.000    | rs73366713<br>rs113755256<br>rs73724866<br>rs7770062<br>rs59430691 | 0.267<br>0.205<br>0.187<br>0.158<br>0.157 | PC-HiC<br>PC-HiC<br>PC-HiC<br>PC-HiC<br>PC-HiC |      |                        |                    | [21475249, 22306179]           |
| <i>EFNA5</i>   | 1.000    | rs6871532                                                          | 0.288                                     | distance                                       |      | ✓                      |                    | [23562676, 30909943, 25359705] |
| <i>ERBB4</i>   | 1.000    | rs6738011                                                          | 0.112                                     | distance                                       |      | ✓                      |                    | [19632177]                     |
| <i>KCNN2</i>   | 1.000    | rs337705<br>rs337708                                               | 0.477<br>0.119                            | distance<br>distance                           |      |                        | ✓                  | [19139040]                     |
| <i>RPL3L</i>   | 1.000    | rs140185678                                                        | 1                                         | exon                                           |      |                        |                    | [32870709, 32514796]           |
| <i>TUBA8</i>   | 1.000    | rs464901<br>rs361834                                               | 0.853<br>0.147                            | nearby OCR<br>nearby OCR                       |      |                        |                    | [31398994]                     |
| <i>EPHA3</i>   | 0.999    | rs35124509<br>rs6771054<br>rs2117137                               | 0.375<br>0.154<br>0.108                   | exons<br>distance<br>distance                  |      |                        |                    | [17046737]                     |
| <i>THRB</i>    | 0.999    | rs73041705<br>rs73032363<br>rs9841040<br>rs1865712                 | 0.173<br>0.136<br>0.127<br>0.118          | distance<br>distance<br>distance<br>distance   |      | ✓                      |                    | [28740583]                     |
| <i>ETV1</i>    | 0.998    | rs55734480<br>rs12154315<br>rs12112152                             | 0.394<br>0.335<br>0.223                   | distance<br>distance<br>distance               |      |                        | ✓                  | [27775552, 29930145]           |
| <i>PITX2</i>   | 0.997    | rs2220427                                                          | 0.193                                     | distance                                       |      |                        | ✓                  | [28217939, 29367545, 32309338] |

|               |       |                                                   |                                  |                                                             |   |   |   |                         |
|---------------|-------|---------------------------------------------------|----------------------------------|-------------------------------------------------------------|---|---|---|-------------------------|
| <i>TBX5</i>   | 0.997 | rs7312625<br>rs883079<br>rs7955405<br>rs10507248  | 0.404<br>0.199<br>0.141<br>0.107 | distance<br>exon<br>PC-HiC<br>PC-HiC                        |   | ✓ | ✓ | [28057264]              |
| <i>CAMK2D</i> | 0.996 | rs17446418<br>rs2285703                           | 0.43<br>0.166                    | PC-HiC<br>PC-HiC                                            |   | ✓ | ✓ | [24030498]              |
| <i>PKP2</i>   | 0.993 | rs2045172                                         | 0.841                            | PC-HiC                                                      |   | ✓ |   | [28740174]              |
| <i>NKX2-5</i> | 0.990 | rs6882776<br>rs6891790<br>rs2277923<br>rs10071514 | 0.343<br>0.294<br>0.202<br>0.14  | active promoter<br>ABC/nearby OCR<br>exon<br>ABC/nearby OCR | ✓ |   |   | [26805889]              |
| <i>LRIG1</i>  | 0.982 | rs34080181<br>rs900171                            | 0.322<br>0.156                   | distance<br>exon                                            |   |   |   | [23558895,<br>19632177] |
| <i>ZEB2</i>   | 0.979 | rs10496971                                        | 0.805                            | distance                                                    |   |   |   | [33398012]              |
| <i>TTN</i>    | 0.977 | rs3731746<br>rs2857265<br>rs3829748<br>rs3731748  | 0.317<br>0.265<br>0.182<br>0.15  | exon<br>exon<br>exon<br>exon                                | ✓ | ✓ | ✓ | [30535219]              |
| <i>MYO18B</i> | 0.973 | rs133902<br>rs133885                              | 0.609<br>0.196                   | distance<br>exon                                            |   | ✓ |   | [27858739]              |

895  
896  
897  
898  
899  
900  
901

\* In the Supporting SNPs column, only SNPs that contribute a fractional PIP (SNP PIP multiplied by the weight of the SNP to that gene) of 0.1 or more are shown. *NR3C1* is not included because it does not have any SNPs with fractional PIP  $\geq 0.1$ .

\* Nearby OCR is defined as OCR within 20 kb of active promoter of the gene.

## 902 References

- 903 1. Benjamin, E. J. *et al.* Independent Risk Factors for Atrial Fibrillation in a Population-Based  
904 Cohort: The Framingham Heart Study. *JAMA* **271**, 840–844 (1994).
- 905 2. Kornej, J., Börschel, C. S., Benjamin, E. J. & Schnabel, R. B. Epidemiology of Atrial  
906 Fibrillation in the 21st Century. *Circ. Res.* **127**, 4–20 (2020).
- 907 3. Roselli, C. *et al.* Multi-ethnic genome-wide association study for atrial fibrillation. *Nat. Genet.*  
908 **50**, 1225–1233 (2018).
- 909 4. Roselli, C., Rienstra, M. & Ellinor, P. T. Genetics of Atrial Fibrillation in 2020. *Circ. Res.*  
910 **127**, 21–33 (2020).
- 911 5. Nielsen, J. B. *et al.* Biobank-driven genomic discovery yields new insight into atrial  
912 fibrillation biology. *Nat. Genet.* **50**, 1234–1239 (2018).
- 913 6. Arking, D. E. *et al.* Genetic association study of QT interval highlights role for calcium  
914 signaling pathways in myocardial repolarization. *Nat. Genet.* **46**, 826–836 (2014).

- 915 7. Pfeufer, A. et al. Genome-wide association study of PR interval. *Nat. Genet.* **42**, 153–159  
916 (2010).
- 917 8. Maurano, M. T. et al. Systematic Localization of Common Disease-Associated Variation in  
918 Regulatory DNA. *Science* **337**, 1190–1195 (2012).
- 919 9. Pickrell, J. K. Joint analysis of functional genomic data and genome-wide association studies  
920 of 18 human traits. *Am. J. Hum. Genet.* **94**, 559–573 (2014).
- 921 10. Finucane, H. K. et al. Partitioning heritability by functional annotation using genome-wide  
922 association summary statistics. *Nat. Genet.* **47**, 1228–1235 (2015).
- 923 11. Kundaje, A. et al. Integrative analysis of 111 reference human epigenomes. *Nature* **518**, 317–  
924 330 (2015).
- 925 12. The ENCODE Project Consortium., Moore, J.E., Purcaro, M.J. et al. Expanded  
926 encyclopaedias of DNA elements in the human and mouse genomes. *Nature* **583**, 699–710  
927 (2020).
- 928 13. Nicolae, D. L. et al. Trait-associated SNPs are more likely to be eQTLs: annotation to  
929 enhance discovery from GWAS. *PLoS Genet.* **6**, e1000888 (2010).
- 930 14. The GTEx Consortium. The GTEx Consortium atlas of genetic regulatory effects across  
931 human tissues. *Science* **369**, 1318–1330 (2020).
- 932 15. The GTEx Consortium.. Genetic effects on gene expression across human tissues. *Nature*  
933 **550**, 204–213 (2017).
- 934 16. Uebachs, S. M., Wang, G., Carbonetto, P. & Stephens, M. Flexible statistical methods for  
935 estimating and testing effects in genomic studies with multiple conditions. *Nat. Genet.* **51**, 187–  
936 195 (2019).
- 937 17. Thurman, R. E. et al. The accessible chromatin landscape of the human genome. *Nature* **489**,  
938 75–82 (2012).
- 939 18. Yao, D. W., O’Connor, L. J., Price, A. L. & Gusev, A. Quantifying genetic effects on disease  
940 mediated by assayed gene expression levels. *Nat. Genet.* **52**, 626–633 (2020).
- 941 19. Habib, N. et al. Massively-parallel single nucleus RNA-seq with DroNc-seq. *Nat. Methods*  
942 **14**, 955–958 (2017).
- 943 20. Litviňuková, M. et al. Cells of the adult human heart. *Nature* **588**, 466–472 (2020).
- 944 21. Tucker, N. R. et al. Transcriptional and Cellular Diversity of the Human Heart. *Circulation*  
945 **142**, 466–482 (2020).
- 946 22. Buenrostro, J. D. et al. Single-cell chromatin accessibility reveals principles of regulatory  
947 variation. *Nature* **523**, 486–490 (2015).
- 948 23. Cusanovich, D. A. et al. Multiplex single cell profiling of chromatin accessibility by  
949 combinatorial cellular indexing. *Science* **348**, 910–914 (2015).
- 950 24. Schaid, D. J., Chen, W. & Larson, N. B. From genome-wide associations to candidate causal  
951 variants by statistical fine-mapping. *Nat. Rev. Genet.* **19**, 491–504 (2018).
- 952 25. Wen, X., Lee, Y., Luca, F. & Pique-Regi, R. Efficient Integrative Multi-SNP Association  
953 Analysis via Deterministic Approximation of Posteriors. *Am. J. Hum. Genet.* **98**, 1114–1129  
954 (2016).

- 955 26. Weissbrod, O. *et al.* Functionally informed fine-mapping and polygenic localization of  
956 complex trait heritability. *Nat. Genet.* **52**, 1355–1363 (2020).
- 957 27. Segrè, A. V. *et al.* Common Inherited Variation in Mitochondrial Genes Is Not Enriched for  
958 Associations with Type 2 Diabetes or Related Glycemic Traits. *PLoS Genetics* **6**, e1001058  
959 (2010).
- 960 28. Leeuw, C. A. de, Mooij, J. M., Heskes, T. & Posthuma, D. MAGMA: generalized gene-set  
961 analysis of GWAS data. *PLoS Comput. Biol.* **11**, e1004219 (2015).
- 962 29. Mahajan, A. *et al.* Fine-mapping type 2 diabetes loci to single-variant resolution using high-  
963 density imputation and islet-specific epigenome maps. *Nat. Genet.* **50**, 1505–1513 (2018).
- 964 30. Butler, A., Hoffman, P., Smibert, P., Papalexi, E. & Satija, R. Integrating single-cell  
965 transcriptomic data across different conditions, technologies, and species. *Nat. Biotechnol.* **36**,  
966 411–420 (2018).
- 967 31. Granja, J. M. *et al.* ArchR is a scalable software package for integrative single-cell chromatin  
968 accessibility analysis. *Nat. Genet.* **53**, 403–411 (2021).
- 969 32. Thurman, R. E. *et al.* The accessible chromatin landscape of the human genome. *Nature* **489**,  
970 75–82 (2012).
- 971 33. Buenrostro, J. D. *et al.* Integrated Single-Cell Analysis Maps the Continuous Regulatory  
972 Landscape of Human Hematopoietic Differentiation. *Cell* **173**, 1535–1548.e16 (2018).
- 973 34. Schep, A. N., Wu, B., Buenrostro, J. D. & Greenleaf, W. J. chromVAR: inferring  
974 transcription-factor-associated accessibility from single-cell epigenomic data. *Nat. Methods* **528**,  
975 142 (2017).
- 976 35. Olson, E. N. Gene regulatory networks in the evolution and development of the heart.  
977 *Science* **313**, 1922–7 (2006).
- 978 36. Wen, X. Molecular QTL discovery incorporating genomic annotations using Bayesian false  
979 discovery rate control. *Ann. Appl. Statistics* **10**, 1619–1638 (2016).
- 980 37. Berisa, T. & Pickrell, J. K. Approximately independent linkage disequilibrium blocks in  
981 human populations. *Bioinformatics* **32**, 283–285 (2016).
- 982 38. Wen, X., Lee, Y., Luca, F. & Pique-Regi, R. Efficient Integrative Multi-SNP Association  
983 Analysis via Deterministic Approximation of Posteriors. *Am. J. Hum. Genet.* **98**, 1114–1129  
984 (2016).
- 985 39. Morgan, B. *et al.* Aiolos, a lymphoid restricted transcription factor that interacts with Ikaros  
986 to regulate lymphocyte differentiation. *EMBO J.* **16**, 2004–2013 (1997).
- 987 40. Baert, L., Ahmed, M. C., Manfroi, B. & Huard, B. The number 13 of the family: a  
988 proliferation inducing ligand. *Curr. Opin. Immunol.* **71**, 132–137 (2021).
- 989 41. Montefiori, L. E. *et al.* A promoter interaction map for cardiovascular disease genetics. *Elife*  
990 **7**, e35788 (2018).
- 991 42. Kapoor, A. *et al.* Multiple SCN5A variant enhancers modulate its cardiac gene expression  
992 and the QT interval. *Proc. Natl. Acad. Sci. U.S.A.* **116**, 201808734 (2019).
- 993 43. Claycomb, W. C. *et al.* HL-1 cells: A cardiac muscle cell line that contracts and retains  
994 phenotypic characteristics of the adult cardiomyocyte. *Proc. Natl. Acad. Sci. U.S.A.* **95**, 2979–

- 995 2984 (1998).
- 996 44. Nasser, J. et al. Genome-wide enhancer maps link risk variants to disease genes. *Nature* **593**,  
997 238–243 (2021).
- 998 45. DiFrancesco, D. HCN4, Sinus Bradycardia and Atrial Fibrillation. *Arrhythmia Electrophysiol*  
999 *Rev.* **4**, 9 (2015).
- 1000 46. Ouwerkerk, A. F. van et al. Identification of Functional Variant Enhancers Associated With  
1001 Atrial Fibrillation. *Circ. Res.* **127**, 229–243 (2020).
- 1002 47. Giambartolomei, C. et al. Bayesian Test for Colocalisation between Pairs of Genetic  
1003 Association Studies Using Summary Statistics. *PLoS Genet.* **10**, e1004383 (2014).
- 1004 48. Claussnitzer, M. et al. A brief history of human disease genetics. *Nature* **577**, 179–189  
1005 (2020).
- 1006 49. Ouwerkerk, A. F. van et al. Epigenetic and Transcriptional Networks Underlying Atrial  
1007 Fibrillation. *Circ. Res.* **127**, 34–50 (2020).
- 1008 50. Nadadur, R. D. et al. Pitx2 modulates a Tbx5 -dependent gene regulatory network to  
1009 maintain atrial rhythm. *Sci. Transl. Med.* **8**, 354ra115 (2016).
- 1010 51. Drabkin, M. et al. Nocturnal Atrial Fibrillation Caused by Mutation in KCND2 , Encoding  
1011 Pore-Forming ( $\alpha$ ) Subunit of the Cardiac Kv4.2 Potassium Channel. *Circulation Genom. Precis.*  
1012 *Medicine* **11**, e002293 (2018).
- 1013 52. Mahida, S. et al. Overexpression of KCNN3 results in sudden cardiac death. *Cardiovasc.*  
1014 *Res.* **101**, 326–334 (2013).
- 1015 53. Purohit, A. et al. Oxidized Ca<sup>2+</sup>/Calmodulin-Dependent Protein Kinase II Triggers Atrial  
1016 Fibrillation. *Circulation* **128**, 1748–1757 (2013).
- 1017 54. Yin, H. et al. TAB2 deficiency induces dilated cardiomyopathy by promoting RIPK1-  
1018 dependent apoptosis and necroptosis. *J. Clin. Invest.* (2022) doi:10.1172/jci152297.
- 1019 55. Laforest, B. et al. Atrial fibrillation risk loci interact to modulate Ca<sup>2+</sup>-dependent atrial  
1020 rhythm homeostasis. *J Clin Invest* **129**, 4937–4950 (2019).
- 1021 56. Dai, W. et al. A calcium transport mechanism for atrial fibrillation in Tbx5-mutant mice.  
1022 *Elife* **8**, e41814 (2019).
- 1023 57. Sahoo, S. K. & Kim, D. H. Characterization of calumenin in mouse heart. *BMB Rep.* **43**,  
1024 **158–63** (2010).
- 1025 58. Yamaguchi, N. et al. Cardiac Pressure Overload Decreases ETV1 Expression in the Left  
1026 Atrium, Contributing to Atrial Electrical and Structural Remodeling. *Circulation* **143**, 805–820  
1027 (2021).
- 1028 59. Rommel, C. et al. The Transcription Factor ETV1 Induces Atrial Remodeling and  
1029 Arrhythmia. *Circ. Res.* **123**, 550–563 (2018).
- 1030 60. Shekhar, A. et al. Transcription factor ETV1 is essential for rapid conduction in the heart. *J.*  
1031 *Clin. Invest.* **126**, 4444–4459 (2016).
- 1032 61. Huang, J. et al. Fibroblast growth factor 9 (FGF9) inhibits myogenic differentiation of  
1033 C2C12 and human muscle cells. *Cell Cycle* **18**, 1–19 (2019).
- 1034 62. Itoh, N. & Ohta, H. Pathophysiological roles of FGF signaling in the heart. *Front. Physiol.* **4**,



- 1035 247 (2013).
- 1036 63. Hsu, J. *et al.* Genetic Control of Left Atrial Gene Expression Yields Insights into the Genetic  
1037 Susceptibility for Atrial Fibrillation. *Circulation Genom. Precis. Medicine* **11**, e002107 (2018).
- 1038 64. Tsai, C.-T. *et al.* Next-generation sequencing of nine atrial fibrillation candidate genes  
1039 identified novel de novo mutations in patients with extreme trait of atrial fibrillation. *J. Med.*  
1040 *Genet.* **52**, 28 (2015).
- 1041 65. Scott, J. D. & Santana, L. F. A-Kinase Anchoring Proteins. *Circulation* **121**, 1264–1271  
1042 (2010).
- 1043 66. Huang, T. *et al.* AKAP5 anchors PKA to enhance regulation of the HERG channel. *Int. J.*  
1044 *Biochem. Cell Biology* **122**, 105741 (2020).
- 1045 67. Nasser, J. , Bergman, D.T., Fulco, C.P. *et al.* Genome-wide enhancer maps link risk variants  
1046 to disease genes. *Nature* **593**, 238–243 (2021).
- 1047 68. Ahlberg, G. *et al.* Rare truncating variants in the sarcomeric protein titin associate with  
1048 familial and early-onset atrial fibrillation. *Nat. Commun.* **9**, 4316 (2018).
- 1049 69. Choi, S. H. *et al.* Monogenic and Polygenic Contributions to Atrial Fibrillation Risk. *Circ.*  
1050 *Res.* **126**, 200–209 (2020).
- 1051 70. Ouwerkerk, A. F. van *et al.* Identification of atrial fibrillation associated genes and functional  
1052 non-coding variants. *Nat. Commun.* **10**, 4755 (2019).
- 1053 71. Szklarczyk, D. *et al.* STRING v11: protein–protein association networks with increased  
1054 coverage, supporting functional discovery in genome-wide experimental datasets. *Nucleic Acids*  
1055 *Res.* **47**, gky1131 (2018).
- 1056 72. Benaglio, P. *et al.* Allele-specific NKX2-5 binding underlies multiple genetic associations  
1057 with human electrocardiographic traits. *Nat. Genet.* **51**, 1506–1517 (2019).
- 1058 73. Schindler, Y. L. *et al.* Hand2 elevates cardiomyocyte production during zebrafish heart  
1059 development and regeneration. *Development* **141**, 3112–3122 (2014).
- 1060 74. Cohen, A. S. A. *et al.* Haploinsufficiency of the basic helix–loop–helix transcription factor  
1061 HAND2 causes congenital heart defects. *Am. J. Med. Genet.* **182**, 1263–1267 (2020).
- 1062 75. Romero-Becerra, R., Santamans, A. M., Folgueira, C. & Sabio, G. p38 MAPK Pathway in  
1063 the Heart: New Insights in Health and Disease. *Int. J. Mol. Sci.* **21**, 7412 (2020).
- 1064 76. O’Neal, W. T. *et al.* Ephrin–Eph signaling as a potential therapeutic target for the treatment  
1065 of myocardial infarction. *Med. Hypotheses* **80**, 738–744 (2013).
- 1066 77. Su, S. *et al.* Essential roles of EphrinB2 in mammalian heart: from development to diseases.  
1067 *Cell Commun. Signal.* **17**, 29 (2019).
- 1068 78. Chen, K. *et al.* EphB4 Forward-Signaling Regulates Cardiac Progenitor Development in  
1069 Mouse ES Cells. *J. Cell Biochem.* **116**, 467–475 (2015).
- 1070 79. Chun, S. *et al.* Limited statistical evidence for shared genetic effects of eQTLs and  
1071 autoimmune disease-associated loci in three major immune cell types. *Nat. Genet.* **49**, 600–605  
1072 (2017).
- 1073 80. Degner, J. F. *et al.* DNaseI sensitivity QTLs are a major determinant of human expression  
1074 variation. *Nature* **482**, 390–394 (2012).

- 1075 81. Wijst, M. G. P. van der *et al.* Single-cell RNA sequencing identifies celltype-specific cis-  
1076 eQTLs and co-expression QTLs. *Nat. Genet.* **50**, 493–497 (2018).
- 1077 82. Hocker, J. D. *et al.* Cardiac cell type–specific gene regulatory programs and disease risk  
1078 association. *Sci. Adv.* **7**, eabf1444 (2021).
- 1079 83. Chiou, J. *et al.* Single-cell chromatin accessibility identifies pancreatic islet cell type– and  
1080 state-specific regulatory programs of diabetes risk. *Nat. Genet.* **53**, 455–466 (2021).
- 1081 84. Chiou, J. *et al.* Interpreting type 1 diabetes risk with genetics and single-cell epigenomics.  
1082 *Nature* **594**, 398–402 (2021).
- 1083 85. Corces, M. R. *et al.* Single-cell epigenomic analyses implicate candidate causal variants at  
1084 inherited risk loci for Alzheimer’s and Parkinson’s diseases. *Nat. Genet.* **52**, 1158–1168 (2020).
- 1085 86. Lozano-Velasco, E., Franco, D., Aranega, A. & Daimi, H. Genetics and Epigenetics of Atrial  
1086 Fibrillation. *Int. J. Mol. Sci.* **21**, 5717 (2020).
- 1087 87. Wang, J., Gareri, C. & Rockman, H. A. G-Protein–Coupled Receptors in Heart Disease.  
1088 *Circ. Res.* **123**, 716–735 (2018).
- 1089 88. Foulquier, S. *et al.* WNT Signaling in Cardiac and Vascular Disease. *Pharmacol. Rev.* **70**,  
1090 68–141 (2018).
- 1091 89. Nattel, S. Molecular and Cellular Mechanisms of Atrial Fibrosis in Atrial Fibrillation. *JACC*  
1092 *Clin. Electrophysiol.* **3**, 425–435 (2017).
- 1093 90. Schmiedel, B. J. *et al.* Impact of Genetic Polymorphisms on Human Immune Cell Gene  
1094 Expression. *Cell* **175**, 1701-1715.e16 (2018).
- 1095 91. Study, L. C. *et al.* Single-cell RNA sequencing identifies celltype-specific cis-eQTLs and co-  
1096 expression QTLs. *Nat. Genet.* **50**, 493–497 (2018).
- 1097 92. Wijst, M. G. van der *et al.* The single-cell eQTLGen consortium. *Elife* **9**, e52155 (2020).
- 1098 93. Chromium Single Cell 3’ Reagent Kits User Guide (v3.1 Chemistry).  
1099 [https://support.10xgenomics.com/single-cell-gene-expression/library-prep/doc/user-guide-](https://support.10xgenomics.com/single-cell-gene-expression/library-prep/doc/user-guide-chromium-single-cell-3-reagent-kits-user-guide-v31-chemistry)  
1100 [chromium-single-cell-3-reagent-kits-user-guide-v31-chemistry](https://support.10xgenomics.com/single-cell-gene-expression/library-prep/doc/user-guide-chromium-single-cell-3-reagent-kits-user-guide-v31-chemistry) (2019).
- 1101 94. Selewa, A. *et al.* Systematic Comparison of High-throughput Single-Cell and Single-Nucleus  
1102 Transcriptomes during Cardiomyocyte Differentiation. *Sci. Rep.* **10**, 1535 (2020).
- 1103 95. FastQC. <https://qubeshub.org/resources/fastqc> (2015).
- 1104 96. Andrews, S. FastQC: A Quality Control Tool for High Throughput Sequence Data [Online].  
1105 <http://www.bioinformatics.babraham.ac.uk/projects/fastqc/> (2010).
- 1106 97. Kaminow, B., Yunusov, D. & Dobin, A. STARsolo: accurate, fast and versatile  
1107 mapping/quantification of single-cell and single-nucleus RNA-seq data. *Biorxiv*  
1108 2021.05.05.442755 (2021) doi:10.1101/2021.05.05.442755.
- 1109 98. Frankish, A. *et al.* GENCODE reference annotation for the human and mouse genomes.  
1110 *Nucleic Acids Res.* **47**, gky955- (2018).
- 1111 99. Stuart, T. *et al.* Comprehensive Integration of Single-Cell Data. *Cell* **177**, 1888-1902.e21  
1112 (2019).
- 1113 100. McGinnis, C. S., Murrow, L. M. & Gartner, Z. J. DoubletFinder: Doublet Detection in  
1114 Single-Cell RNA Sequencing Data Using Artificial Nearest Neighbors. *Cell Syst.* **8**, 329-337.e4

- 1115 (2019).
- 1116 101. Satpathy, A. T. *et al.* Massively parallel single-cell chromatin landscapes of human immune  
1117 cell development and intratumoral T cell exhaustion. *Nat. Biotechnol.* **37**, 925–936 (2019).
- 1118 102. Korsunsky, I. *et al.* Fast, sensitive and accurate integration of single-cell data with  
1119 Harmony. *Nat. Methods* **16**, 1289–1296 (2019).
- 1120 103. Zhang, Y. *et al.* Model-based Analysis of ChIP-Seq (MACS). *Genome Biol.* **9**, R137–R137  
1121 (2008).
- 1122 104. Weirauch, M. T. *et al.* Determination and Inference of Eukaryotic Transcription Factor  
1123 Sequence Specificity. *Cell* **158**, 1431–1443 (2014).
- 1124 105. Pliner, H. A. *et al.* Cicero Predicts cis-Regulatory DNA Interactions from Single-Cell  
1125 Chromatin Accessibility Data. *Mol. Cell.* **71**, 858–871.e8 (2018).
- 1126 106. Lindblad-Toh, K. *et al.* A high-resolution map of human evolutionary constraint using 29  
1127 mammals. *Nature* **478**, 476–82 (2011).
- 1128 107. Wang, G., Sarkar, A., Carbonetto, P. & Stephens, M. A simple new approach to variable  
1129 selection in regression, with application to genetic fine mapping. *J. R. Stat. Soc. Ser. B.*  
1130 *Statistical Methodol.* **82**, 1273–1300 (2020).
- 1131 108. Clarke, L. *et al.* The international Genome sample resource (IGSR): A worldwide collection  
1132 of genome variation incorporating the 1000 Genomes Project data. *Nucleic Acids Res.* **45**, D854–  
1133 D859 (2017).
- 1134 109. Coetzee, S. G., Coetzee, G. A. & Hazelett, D. J. motifbreakR: an R/Bioconductor package  
1135 for predicting variant effects at transcription factor binding sites. *Bioinformatics* **31**, 3847–3849  
1136 (2015).
- 1137 110. Fulco, C. P. *et al.* Activity-by-contact model of enhancer–promoter regulation from  
1138 thousands of CRISPR perturbations. *Nat. Genet.* **51**, 1664–1669 (2019).
- 1139 111. Szklarczyk, D. *et al.* The STRING database in 2021: customizable protein–protein  
1140 networks, and functional characterization of user-uploaded gene/measurement sets. *Nucleic*  
1141 *Acids Res.* **49**, gkaa1074- (2020).
- 1142 112. Shannon, P. *et al.* Cytoscape: A Software Environment for Integrated Models of  
1143 Biomolecular Interaction Networks. *Genome Res.* **13**, 2498–2504 (2003).
- 1144 113. Ashburner, M. *et al.* Gene Ontology: tool for the unification of biology. *Nat. Genet.* **25**, 25–  
1145 29 (2000).
- 1146 114. The Gene Ontology Consortium. The Gene Ontology resource: enriching a GOLD mine.  
1147 *Nucleic Acids Res.* **49**, D325–D334 (2020).
- 1148 115. Jassal, B. *et al.* The reactome pathway knowledgebase. *Nucleic Acids Res.* **48**, D498–D503  
1149 (2019).
- 1150 116. Kanehisa, M. & Goto, S. KEGG: Kyoto Encyclopedia of Genes and Genomes. *Nucleic*  
1151 *Acids Res.* **28**, 27–30 (2000).
- 1152 117. Pers, T. H., Timshel, P. & Hirschhorn, J. N. SNPsnap: a Web-based tool for identification  
1153 and annotation of matched SNPs. *Bioinformatics* **31**, 418–420 (2015).
